# Supplementary material
Source: PubMed Central journal article supplement (PMC3605761)
Supplement: NIHMS50373-supplement-1.pdf [file NIHMS50373-supplement-1.pdf]

|                       | Sample QC |                           |                                  |             |             |           |              |              |
|-----------------------|-----------|---------------------------|----------------------------------|-------------|-------------|-----------|--------------|--------------|
|                       | Start     | <99%<br>Call<br>frequency | Fail Autosomal<br>Heterozygosity | Fail<br>IBD | Fail<br>PCA | Remaining | ACPA-<br>POS | ACPA-<br>NEG |
| UK cases              | 4,269     | 243                       | 5                                | 126         | 25          | 3,870     | 2,406        | 1,000        |
| UK controls           | 8,926     | 145                       | 5                                | 285         | 61          | 8,430     | -            | -            |
| Swedish EIRA cases    | 2,968     | 62                        | 14                               | 41          | 89          | 2,762     | 1,762        | 987          |
| Swedish EIRA controls | 2,106     | 76                        | 6                                | 22          | 62          | 1,940     | -            | -            |
| US cases              | 3,621     | 487                       | 19                               | 488         | 91          | 2,536     | 1,803        | 593          |
| US controls           | 3,887     | 480                       | 41                               | 98          | 1,134       | 2,134     | -            | -            |
| Dutch cases           | 704       | 12                        | 3                                | 16          | 25          | 648       | 330          | 301          |
| Dutch controls        | 2,085     | 23                        | 1                                | 33          | 24          | 2,004     | -            | -            |
| Swedish Umea cases    | 1,085     | 139                       | 2                                | 85          | 7           | 852       | 524          | 242          |
| Swedish Umea controls | 1,021     | 3                         | 3                                | 44          | 8           | 963       | -            | -            |
| Spanish cases         | 914       | 53                        | 10                               | 13          | 31          | 807       | 397          | 216          |
| Spanish controls      | 447       | 14                        | 2                                | 29          | 3           | 399       | -            | -            |
| Total cases           | 13,561    | 996                       | 53                               | 769         | 268         | 11,475    | 7,222        | 3,339        |
| Total controls        | 18,472    | 741                       | 58                               | 511         | 1,292       | 15,870    |              |              |

**Supplementary Table 1:** Quality control measures implemented on the ImmunoChip array data illustrating numbers of samples failing in each collection.

| Start                                               |                        | SNP loss |        |  | Final   |
|-----------------------------------------------------|------------------------|----------|--------|--|---------|
| Group                                               | Call Frequency (<0.99) | HWE      | MAF    |  |         |
|                                                     |                        |          |        |  | 196,524 |
|                                                     |                        |          |        |  | 1,735   |
|                                                     |                        |          |        |  | 1       |
|                                                     |                        |          |        |  | 12,715  |
|                                                     |                        |          |        |  | 12,510  |
|                                                     |                        |          |        |  | 2,243   |
|                                                     |                        |          |        |  | 936     |
|                                                     |                        |          |        |  | 835     |
|                                                     |                        |          |        |  | 165,549 |
| UK                                                  | 2,468                  | 680      | 36,543 |  | 125,858 |
| US                                                  | 10,484                 | 299      | 34,769 |  | 119,997 |
| SE-E                                                | 3,851                  | 248      | 36,788 |  | 124,662 |
| SE-U                                                | 3,229                  | 156      | 38,037 |  | 124,127 |
| NL                                                  | 3,321                  | 233      | 37,070 |  | 124,925 |
| ES                                                  | 4,491                  | 51       | 36,169 |  | 124,838 |
| Included in Study (passed QC in at least 2 studies) |                        |          |        |  | 129,464 |

**Supplementary Table 2:** Summary of SNPs failing ImmunoChip quality control metrics.

| Chr                                 | SNP        | POSITION*   | GENE     | Allele | STUDY P           | STUDY OR | ACPA + P          | ACPA+ OR | ACPA - P        | ACPA - OR | Autoimmune disease associations |
|-------------------------------------|------------|-------------|----------|--------|-------------------|----------|-------------------|----------|-----------------|-----------|---------------------------------|
| a) previously known associated loci |            |             |          |        |                   |          |                   |          |                 |           |                                 |
| 6                                   | rs660895   | 32,577,380  | HLA      | G      | <u>&lt;1E-300</u> | 2.265    | <u>&lt;1E-300</u> | 3.0299   | <u>1.54E-08</u> | 1.2083    | Multiple                        |
| 1                                   | rs2476601  | 114,377,568 | PTPN22   | A      | <u>9.01E-62</u>   | 1.5935   | <u>7.53E-77</u>   | 1.7845   | 1.75E-04        | 1.1828    | RA, T1D, SLE, CD                |
| 5                                   | rs71624119 | 55,440,730  | ANKRD55  | A      | <u>5.59E-20</u>   | 0.8134   | <u>1.20E-11</u>   | 0.8378   | <u>5.18E-12</u> | 0.7843    | RA, T2D                         |
| 6                                   | rs6920220  | 138,006,504 | TNFAIP3  | A      | <u>1.84E-10</u>   | 1.1509   | <u>2.27E-13</u>   | 1.2026   | 3.79E-02        | 1.0732    | CeD, RA, SLE, Ps, T1D, MS, PBC  |
| 4                                   | rs12506688 | 26,104,113  | RBPJ     | A      | <u>3.73E-10</u>   | 1.1337   | <u>2.51E-10</u>   | 1.1571   | 4.16E-02        | 1.0652    | RA, T1D                         |
| 6                                   | rs59466457 | 167,537,754 | CCR6     | A      | <u>3.47E-06</u>   | 1.0903   | <u>2.74E-10</u>   | 1.1455   | 6.44E-01        | 0.9869    | CD,RA, AITD                     |
| 2                                   | rs13426947 | 191,933,254 | STAT4    | A      | <u>7.19E-10</u>   | 1.1533   | <u>7.50E-09</u>   | 1.1663   | 2.67E-03        | 1.1116    | SLE,RA, CeD, PBC                |
| 9                                   | rs2812378  | 34,710,260  | CCL21    | G      | <u>1.31E-08</u>   | 1.1167   | <u>7.23E-10</u>   | 1.1473   | 1.40E-02        | 1.0756    | RA                              |
| 20                                  | rs6032662  | 44,734,310  | CD40     | G      | 1.72E-05          | 0.9104   | <u>1.37E-09</u>   | 0.8564   | 7.10E-01        | 1.0123    | RA, MS                          |
| 1                                   | rs2843401  | 2,528,133   | MMEL1    | A      | 6.87E-07          | 0.9055   | <u>6.58E-09</u>   | 0.8738   | 6.02E-01        | 0.9842    | CeD,RA, UC, MS, AITD, PBC       |
| 2                                   | rs10209110 | 100,672,692 | AFF3     | A      | <u>1.13E-08</u>   | 0.8996   | <u>6.79E-08</u>   | 0.891    | 0.01231         | 0.9317    | RA, T1D                         |
| 2                                   | rs34695944 | 61,124,850  | REL      | G      | 4.14E-06          | 1.0918   | <u>2.58E-08</u>   | 1.13     | 2.90E-01        | 1.0314    | Ps,RA , CeD, CD, UC             |
| 2                                   | rs11571302 | 204,742,934 | CTLA4    | A      | 4.73E-07          | 0.9104   | <u>4.49E-08</u>   | 0.8886   | 1.22E-01        | 0.9569    | RA, AITD, T1D,CeD               |
| 5                                   | rs39984    | 102,597,292 | GIN1     | A      | <u>9.29E-08</u>   | 0.8792   | 3.04E-06          | 0.8756   | 1.32E-04        | 0.8674    | RA, SLE                         |
| 3                                   | rs35677470 | 58,183,636  | DNASE1L3 | A      | 1.74E-07          | 1.1946   | 1.09E-06          | 1.2095   | 1.41E-02        | 1.1382    | RA, SLE                         |
| 7                                   | rs3807306  | 128,580,680 | IRF5     | C      | 2.48E-07          | 0.9093   | 1.90E-07          | 0.8947   | 2.22E-02        | 0.9374    | SLE,RA, UC, PBC                 |
| 22                                  | rs3218251  | 37,545,505  | IL2RB    | A      | 5.82E-06          | 1.0987   | 1.91E-07          | 1.1325   | 2.15E-01        | 1.0402    | RA,T1D                          |
| 2                                   | rs1980422  | 204,610,396 | CD28     | G      | 4.62E-06          | 1.1051   | 2.57E-07          | 1.1376   | 0.4738          | 1.0244    | RA, AITD, T1D,CeD               |

|                                             |            |             |         |   |                        |        |                        |        |          |        |                          |
|---------------------------------------------|------------|-------------|---------|---|------------------------|--------|------------------------|--------|----------|--------|--------------------------|
| 11                                          | rs4938573  | 118,741,842 | DDX6    | G | 3.97E-05               | 0.9072 | 5.31E-07               | 0.8703 | 6.31E-01 | 0.983  | RA, SLE, MS,<br>PBC, CeD |
| 2                                           | rs6546146  | 65,556,324  | SPRED2  | A | 1.91E-05               | 0.9205 | 7.98E-07               | 0.8952 | 5.05E-01 | 0.9805 | RA                       |
| 6                                           | rs629326   | 159,496,713 | TAGAP   | C | 5.61E-03               | 0.9492 | 1.13E-06               | 0.8993 | 5.19E-01 | 1.0187 | CeD, RA, CD,<br>T1D, MS  |
| 9                                           | rs10739580 | 123,695,282 | TRAF1   | G | 4.56E-05               | 1.0846 | 1.68E-06               | 1.1152 | 9.53E-02 | 1.0527 | RA, SLE                  |
| 10                                          | rs10795791 | 6,108,340   | IL2RA   | G | 3.01E-06               | 1.0921 | 4.71E-06               | 1.1047 | 6.30E-02 | 1.0551 | RA, MS,T1D,<br>CD        |
| 8                                           | rs4840565  | 11,345,545  | BLK     | G | 3.88E-06               | 1.0987 | 3.46E-04               | 1.0877 | 1.01E-04 | 1.1275 | SLE, RA                  |
| 1                                           | rs798000   | 117,280,696 | CD2     | G | 8.92E-05               | 1.0802 | 6.19E-06               | 1.1081 | 4.43E-01 | 1.0234 | RA, MS                   |
| 12                                          | rs10683701 | 58,092,089  | KIF5A   | - | 4.39E-05               | 0.9221 | 2.31E-05               | 0.9072 | 4.03E-01 | 0.9751 | RA,MS                    |
| 1                                           | rs16843807 | 198,745,722 | PTPRC   | C | 1.10E-04               | 0.8905 | 2.48E-05               | 0.863  | 6.38E-01 | 0.9787 | RA                       |
| 10                                          | rs947474   | 6,390,450   | PRKCQ   | G | 2.51E-05               | 0.9038 | 3.98E-05               | 0.8872 | 0.1236   | 0.94   | RA, T1D, CeD             |
| 1                                           | rs11810143 | 161,480,649 | FCGR2A  | G | 9.34E-05               | 1.1153 | 1.74E-04               | 1.1339 | 0.1453   | 1.0709 | RA, CD, SLE,<br>UC       |
| 6                                           | rs6911690  | 106,470,963 | PRDM1   | G | 5.17E-04               | 0.9004 | 1.69E-04               | 0.8692 | 0.4235   | 0.9605 | CD, RA, SLE              |
| 4                                           | rs78560100 | 123,041,471 | IL2-21  | C | 4.48E-04               | 1.131  | 1.18E-03               | 1.1425 | 0.00334  | 1.1802 | CeD, T1D, RA,<br>UC      |
| 11                                          | rs570676   | 36,492,191  | TRAF6   | A | 4.81E-03               | 0.94   | 1.10E-03               | 0.93   | 0.46     | 0.97   | RA                       |
| b) newly associated loci on ImmunoChip      |            |             |         |   |                        |        |                        |        |          |        |                          |
| 19                                          | rs34536443 | 10,463,118  | TYK2    | G | <b><u>2.70E-13</u></b> | 0.6885 | <b><u>2.25E-14</u></b> | 0.6208 | 1.16E-02 | 0.8246 | MS, CD, Ps,<br>T1D, SLE  |
| 23                                          | rs13397    | 153,248,248 | IRAK1   | A | <b><u>2.52E-12</u></b> | 1.2342 | <b><u>1.23E-12</u></b> | 1.2747 | 3.12E-05 | 1.206  | SLE, T1D, CeD            |
| 15                                          | rs8026898  | 69,991,417  | TLE3    | A | <b><u>2.22E-09</u></b> | 1.1327 | <b><u>1.37E-10</u></b> | 1.1662 | 3.70E-03 | 1.0969 | BD                       |
| 15                                          | rs8043085  | 38,828,140  | RASGRP1 | A | 1.63E-07               | 1.1193 | <b><u>1.40E-10</u></b> | 1.1713 | 3.72E-01 | 1.0303 | T1D                      |
| 1                                           | rs2240336  | 17,674,402  | PADI4   | A | <b><u>3.64E-08</u></b> | 0.9003 | <b><u>5.91E-09</u></b> | 0.8794 | 2.83E-02 | 0.9381 | RA                       |
| 1                                           | rs8192284  | 154,426,970 | IL6R    | C | <b><u>1.32E-08</u></b> | 0.897  | 1.57E-07               | 0.8903 | 2.44E-02 | 1      | Asthma, CHD              |
| 16                                          | rs13330176 | 86,019,087  | IRF8    | A | 9.31E-07               | 1.1131 | <b><u>4.03E-08</u></b> | 1.1475 | 7.72E-01 | 1.0099 | SLE, UC, MS,<br>PBC      |
| c) suggestive associated loci on ImmunoChip |            |             |         |   |                        |        |                        |        |          |        |                          |

|    |            |             |                  |          |                 |        |          |        |          |        |              |
|----|------------|-------------|------------------|----------|-----------------|--------|----------|--------|----------|--------|--------------|
| 7  | rs75351767 | 37,427,351  | ELMO1            | <b>G</b> | <u>2.94E-07</u> | 1.1604 | 3.85E-05 | 1.1473 | 5.95E-05 | 1.1917 |              |
| 17 | rs12936409 | 38,043,649  | IKZF3            | <b>A</b> | <u>3.72E-07</u> | 1.1029 | 6.90E-07 | 1.1158 | 1.13E-01 | 1.0483 | CD, UC T1D   |
| 6  | rs72928038 | 90,976,768  | BACH2            | <b>A</b> | <u>8.23E-07</u> | 1.1282 | 1.12E-04 | 1.1156 | 2.16E-03 | 1.1207 | T1D, CD      |
| 3  | rs1875463  | 143,165,502 | SLC9A9           | <b>A</b> | <u>1.51E-06</u> | 0.8996 | 2.88E-04 | 0.9119 | 4.75E-05 | 0.8709 |              |
| 10 | rs12764378 | 63,800,004  | ARID5B           | A        | 1.81E-05        | 1.0994 | 1.64E-06 | 1.1292 | 6.96E-01 | 1.0135 |              |
| 5  | rs6579837  | 150,434,894 | TNIP1            | A        | 4.04E-05        | 1.1498 | 1.71E-06 | 1.2062 | 2.48E-02 | 1.1239 | SLE, Ps      |
| 14 | rs911263   | 68,753,593  | ACTN1            | G        | 4.59E-04        | 0.9302 | 2.28E-06 | 0.8924 | 8.33E-01 | 0.9934 | T1D          |
| 10 | rs3802604  | 8,102,272   | GATA3            | G        | 5.07E-05        | 1.0813 | 3.68E-06 | 1.1085 | 2.17E-01 | 1.0372 |              |
| 18 | rs62097857 | 12,857,758  | PTPN2            | <b>A</b> | <u>4.46E-06</u> | 1.2224 | 8.80E-05 | 1.2171 | 1.14E-04 | 1.2825 | CD, CeD, T1D |
| 13 | rs7993214  | 40,350,912  | COG6             | A        | 1.02E-04        | 0.9263 | 4.55E-06 | 0.9005 | 4.32E-01 | 0.9768 |              |
| 1  | rs61828284 | 173,299,743 | TNFSF18 / TNFSF4 | A        | 5.68E-05        | 0.8659 | 5.47E-06 | 0.8256 | 8.26E-01 | 0.9885 | CD, SLE      |
| 13 | rs17230016 | 82,338,338  | SPRY2            | <b>G</b> | <u>9.61E-06</u> | 0.8838 | 1.78E-04 | 0.886  | 1.44E-03 | 0.8709 |              |

**Supplementary Table 3:** Summary of lead SNPs for RA associated loci on Immunochip. Results are from 11,475 RA cases versus 15,870 controls (STUDY) or for a subset of 7,222 ACPA positive cases (ACPA +) or 3,297 ACPA negative cases (ACPA -) versus the 15,870 controls. Associations reaching genome wide significance **emboldened** and underlined. \*co-ordinates based on GRCh37 assembly

|         | Locus      | Chr   | All ImmunoChip +GWAS |             |                        | ACPA + ImmunoChip +GWAS |             |                        |
|---------|------------|-------|----------------------|-------------|------------------------|-------------------------|-------------|------------------------|
|         |            |       | bp**                 | SNP         | P                      | bp**                    | SNP         | P                      |
| known   | MMEL1      | 1     | 2,528,133            | rs2843401   | <b><u>3.62E-08</u></b> | 2,528,133               | rs2843401   | <b><u>7.24E-10</u></b> |
|         | REL        | 2     | 61,136,129           | rs13031237  | <b><u>1.40E-09</u></b> | 61,136,129              | rs13031237  | <b><u>1.26E-11</u></b> |
|         | SPRED2     | 2     | 65,597,671           | rs11673987  | <b><u>3.49E-08</u></b> | 65,598,241              | rs1858036   | <b><u>7.48E-10</u></b> |
|         | AFF3       | 2     | 100,806,514          | rs6712515   | <b><u>2.82E-11</u></b> | 100,806,514             | rs6712515   | <b><u>2.00E-11</u></b> |
|         | STAT4      | 2     | 191,969,879          | rs10181656  | <b><u>2.34E-13</u></b> | 191,921,874             | rs11893432  | <b><u>1.53E-11</u></b> |
|         | CD28 CTLA4 | 2     | 204,738,919          | rs3087243   | <b><u>7.48E-11</u></b> | 204,738,919             | rs3087243   | <b><u>3.88E-11</u></b> |
|         | RBPJ       | 4     | 26,086,569           | rs17630466  | <b><u>5.67E-13</u></b> | 26,104,113              | rs12506688  | <b><u>6.00E-13</u></b> |
|         | ANKRD55    | 5     | 55,440,730           | rs71624119* | <b><u>5.68E-20</u></b> | 55,440,730              | rs71624119* | <b><u>1.20E-11</u></b> |
|         | GIN1       | 5     | 102,608,924          | rs2561477   | <b><u>6.52E-10</u></b> | 102,608,924             | rs2561477   | 8.56E-08               |
|         | TNFAIP3    | 6     | 138,006,504          | rs6920220   | <b><u>4.24E-15</u></b> | 138,006,504             | rs6920220   | <b><u>3.55E-18</u></b> |
|         | TAGAP      | 6     | 159,489,791          | rs212389    | 2.99E-05               | 159,489,791             | rs212389    | <b><u>9.11E-09</u></b> |
|         | CCR6       | 6     | 167,540,842          | rs1571878   | <b><u>2.29E-08</u></b> | 167,540,842             | rs1571878   | <b><u>1.23E-12</u></b> |
|         | IRF5       | 7     | 128,580,680          | rs3807306   | <b><u>7.12E-10</u></b> | 128,580,680             | rs3807306   | <b><u>4.75E-10</u></b> |
|         | CCL21      | 9     | 34,710,260           | rs2812378   | <b><u>8.50E-09</u></b> | 34,710,260              | rs2812378   | <b><u>1.26E-09</u></b> |
|         | TRAF1      | 9     | 123,683,569          | rs2269060   | 3.71E-07               | 123,683,569             | rs2269060   | <b><u>1.73E-08</u></b> |
|         | IL2RA      | 10    | 6,108,340            | rs10795791  | <b><u>1.11E-09</u></b> | 6,108,340               | rs10795791  | <b><u>1.19E-09</u></b> |
|         | DDX6       | 11    | 118,611,781          | rs10892279  | <b><u>2.95E-08</u></b> | 118,611,781             | rs10892279  | <b><u>1.34E-10</u></b> |
|         | CD40       | 20    | 44,747,947           | rs4810485   | 2.20E-07               | 44,747,947              | rs4810485   | <b><u>8.86E-11</u></b> |
|         | new        | PADI4 | 1                    | 17,674,108  | rs2240339              | <b><u>2.57E-10</u></b>  | 17,674,108  | rs2240339              |
| POU3F1  |            | 1     | 38,616,871           | rs883220    | 1.19E-07               | 38,616,871              | rs883220    | <b><u>2.09E-08</u></b> |
| IL6R    |            | 1     | 154,426,970          | rs2228145*  | <b><u>1.30E-08</u></b> | 154,426,970             | rs2228145*  | 1.58E-07               |
| GATA3   |            | 10    | 8,095,340            | rs2275806   | 7.38E-08               | 8,095,340               | rs2275806   | <b><u>4.58E-08</u></b> |
| ARID5B  |            | 10    | 63,800,004           | rs12764378  | <b><u>1.00E-08</u></b> | 63,800,004              | rs12764378  | <b><u>4.45E-10</u></b> |
| CD5     |            | 11    | 60,909,581           | rs595158    | <b><u>3.35E-08</u></b> | 60,909,581              | rs595158    | 5.56E-06               |
| RASGRP1 |            | 15    | 38,828,140           | rs8043085   | <b><u>1.76E-08</u></b> | 38,828,140              | rs8043085   | <b><u>4.82E-11</u></b> |
| TLE3    |            | 15    | 69,991,417           | rs8026898   | <b><u>6.03E-11</u></b> | 69,991,417              | rs8026898   | <b><u>6.52E-12</u></b> |
| IRF8    |            | 16    | 86,019,087           | rs13330176  | 1.68E-07               | 86,019,087              | rs13330176  | <b><u>5.30E-09</u></b> |
| IKZF3   |            | 17    | 38,062,196           | rs2305480   | <b><u>4.20E-09</u></b> | 38,040,763              | rs2872507   | <b><u>2.79E-09</u></b> |
| TYK2    |            | 19    | 10,463,118           | rs34536443* | <b><u>2.69E-13</u></b> | 10,463,118              | rs34536443* | <b><u>2.24E-14</u></b> |
| RCAN1   |            | 21    | 35,911,599           | rs2834512   | 4.31E-07               | 35,911,599              | rs2834512   | <b><u>3.06E-08</u></b> |
| RUNX1   |            | 21    | 36715,761            | rs9979383   | <b><u>5.03E-10</u></b> | 36,715,761              | rs9979383   | <b><u>3.69E-08</u></b> |

**Supplementary Table 4.** Combined analysis of ImmunoChip results and imputed GWAS data from non-overlapping samples.

Results from the full ImmunoChip analysis (11,475 RA cases versus 15,870 controls) were added to non-overlapping , ACPA positive samples (2,363) from the latest GWAS meta analysis (All ImmunoChip +GWAS). In addition the ACPA positive GWAS samples were added to the ACPA positive ImmunoChip analysis (7,222 cases versus 15,870 controls) (ACPA+ImmunoChip +GWAS). Associations reaching genome wide significance **emboldened** and underlined. \*SNP not on GWAS. \*\*co-ordinates based on GRCh37 assembly

| CHR                                                                                                        | SNP        | POS         | GENE       | META ACPA+<br>(P value) | META ACPA +<br>(OR) | META ACPA-<br>(P value) | META ACPA-<br>(OR) | META OR of<br>OR (P value) | META OR of<br>OR (OR) |
|------------------------------------------------------------------------------------------------------------|------------|-------------|------------|-------------------------|---------------------|-------------------------|--------------------|----------------------------|-----------------------|
| <b>a) Loci more significant in ACPA positive at p&lt; 0.05 level</b>                                       |            |             |            |                         |                     |                         |                    |                            |                       |
| 1                                                                                                          | rs2476601  | 114,179,091 | PTPN22     | 9.23E-78                | 1.79                | 2.60E-04                | 1.18               | 2.44E-19                   | 1.49                  |
| 6                                                                                                          | rs59466457 | 167,457,744 | CCR6       | 4.77E-10                | 1.14                | 6.84E-01                | 0.99               | 1.00E-06                   | 1.16                  |
| 20                                                                                                         | rs6032662  | 44,167,717  | CD40       | 4.22E-09                | 0.86                | 8.31E-01                | 1.01               | 5.96E-06                   | 0.85                  |
| 15                                                                                                         | rs8043085  | 36,615,432  | RASGRP1    | 3.45E-10                | 1.17                | 3.63E-01                | 1.03               | 2.13E-04                   | 1.14                  |
| 6                                                                                                          | rs629326   | 159,416,701 | TAGAP      | 2.59E-06                | 0.90                | 7.17E-01                | 1.01               | 2.36E-04                   | 0.89                  |
| 11                                                                                                         | rs4938573  | 118,247,052 | DDX6       | 4.84E-07                | 0.87                | 5.96E-01                | 0.98               | 1.46E-03                   | 0.89                  |
| 15                                                                                                         | rs77397211 | 36,757,788  | RASGRP1    | 1.10E-03                | 1.15                | 5.24E-01                | 0.96               | 1.53E-03                   | 1.21                  |
| 2                                                                                                          | rs34695944 | 60,978,354  | REL        | 1.76E-08                | 1.13                | 3.59E-01                | 1.03               | 1.81E-03                   | 1.10                  |
| 1                                                                                                          | rs2843401  | 2,517,993   | MMEL1      | 8.00E-09                | 0.87                | 5.41E-01                | 0.98               | 1.88E-03                   | 0.90                  |
| 6                                                                                                          | rs58721818 | 138,285,432 | TNFAIP3    | 5.94E-12                | 1.46                | 8.99E-02                | 1.14               | 2.15E-03                   | 1.27                  |
| 2                                                                                                          | rs6546146  | 65,409,828  | SPRED2     | 6.03E-07                | 0.89                | 5.08E-01                | 0.98               | 2.20E-03                   | 0.91                  |
| 19                                                                                                         | rs34536443 | 10,324,118  | TYK2       | 3.03E-14                | 0.62                | 7.50E-03                | 0.82               | 2.95E-03                   | 0.77                  |
| 16                                                                                                         | rs13330176 | 84,576,588  | IRF8       | 8.72E-08                | 1.14                | 7.26E-01                | 1.01               | 3.40E-03                   | 1.11                  |
| 10                                                                                                         | rs12722508 | 6,128,749   | IL2RA      | 2.01E-05                | 0.85                | 8.91E-01                | 1.01               | 3.67E-03                   | 0.86                  |
| 1                                                                                                          | rs798000   | 117,082,219 | CD2        | 4.31E-06                | 1.11                | 4.69E-01                | 1.02               | 7.27E-03                   | 1.09                  |
| 10                                                                                                         | rs12764378 | 63,470,010  | ARID5B     | 9.00E-07                | 1.13                | 6.56E-01                | 1.02               | 8.81E-03                   | 1.10                  |
| 2                                                                                                          | rs11571302 | 204,451,179 | CTLA4/CD28 | 4.56E-08                | 0.89                | 1.05E-01                | 0.96               | 8.90E-03                   | 0.92                  |
| 6                                                                                                          | rs6920220  | 138,048,197 | TNFAIP3    | 3.09E-13                | 1.20                | 2.20E-02                | 1.08               | 9.86E-03                   | 1.10                  |
| 4                                                                                                          | rs932036   | 25,699,960  | RBPJ       | 3.55E-10                | 1.16                | 1.76E-02                | 1.08               | 1.78E-02                   | 1.08                  |
| 17                                                                                                         | rs2872507  | 35,294,289  | GSDML      | 1.31E-06                | 1.11                | 2.39E-01                | 1.03               | 2.76E-02                   | 1.07                  |
| 9                                                                                                          | rs2812378  | 34,700,260  | CCL21      | 5.18E-10                | 1.15                | 1.17E-02                | 1.08               | 3.56E-02                   | 1.07                  |
| 21                                                                                                         | rs2834512  | 34,833,469  | RCAN1      | 2.93E-04                | 0.88                | 5.07E-01                | 0.97               | 4.41E-02                   | 0.91                  |
| 17                                                                                                         | rs12936409 | 35,297,175  | GSDML      | 7.71E-07                | 1.11                | 1.13E-01                | 1.05               | 4.52E-02                   | 1.06                  |
| <b>b) Significant in both ACPA positive and negative and no significant difference at p&lt; 0.05 level</b> |            |             |            |                         |                     |                         |                    |                            |                       |
| 5                                                                                                          | rs71624119 | 55,476,487  | ANKRD55    | 1.71E-11                | 0.84                | 6.23E-12                | 0.79               | 8.25E-02                   | 1.07                  |

|    |            |             |          |          |      |          |      |          |      |
|----|------------|-------------|----------|----------|------|----------|------|----------|------|
| 8  | rs4840565  | 11,382,954  | BLK      | 3.43E-04 | 1.09 | 8.53E-05 | 1.13 | 3.32E-01 | 0.97 |
| 21 | rs9979383  | 35,637,631  | RUNX1    | 3.15E-05 | 0.91 | 9.90E-05 | 0.89 | 5.54E-01 | 1.02 |
| 5  | rs39984    | 102,625,191 | GIN1     | 3.83E-06 | 0.88 | 1.65E-04 | 0.87 | 7.61E-01 | 1.01 |
| 1  | rs2014863  | 197,076,224 | PTPRC    | 8.74E-04 | 1.08 | 8.35E-04 | 1.10 | 3.69E-01 | 0.97 |
| 2  | rs932169   | 191,637,523 | STAT4    | 2.39E-02 | 1.09 | 1.16E-03 | 1.18 | 1.20E-01 | 0.92 |
| 19 | rs3176767  | 10,310,751  | ICAM3    | 2.71E-05 | 1.11 | 1.91E-03 | 1.11 | 8.59E-01 | 1.01 |
| 4  | rs78560100 | 123,260,921 | IL2_21   | 1.17E-03 | 1.14 | 2.14E-03 | 1.18 | 6.41E-01 | 0.97 |
| 2  | rs13426947 | 191,641,499 | STAT4    | 4.94E-09 | 1.17 | 2.62E-03 | 1.11 | 1.70E-01 | 1.05 |
| 11 | rs595158   | 60,666,157  | CD5      | 1.76E-05 | 1.10 | 5.97E-03 | 1.08 | 6.42E-01 | 1.01 |
| 3  | rs35677470 | 58,158,676  | DNASE1L3 | 1.50E-06 | 1.21 | 9.28E-03 | 1.15 | 5.16E-01 | 1.04 |

**Supplementary Table 5.** Comparison of the known and newly discovered confirmed RA susceptibility loci in ACPA positive (7,222 cases versus 15,870 controls) and ACPA negative disease (3,297 cases versus 15,870 controls) on ImmunoChip. OR of OR is a formal test to assess, the difference in association between the two serological forms of disease.



| Chromosome name | REGION<br>Position on Chromosome (bp) | Lead<br>SNP | GRAIL<br>p-value | CANDIDATE<br>GENE |
|-----------------|---------------------------------------|-------------|------------------|-------------------|
| 1               | 2,528,133                             | rs2843401   | 7.09E-06         | TNFRSF14          |
| 1               | 17,674,537                            | rs2240335   | 4.04E-02         | PADI4             |
| 1               | 38,616,871                            | rs883220    | 9.67E-01         | POU3F1            |
| 1               | 114,377,568                           | rs2476601   | 2.87E-05         | PTPN22            |
| 1               | 117,263,138                           | rs11586238  | 3.69E-10         | CD2               |
| 1               | 154,426,970                           | rs2228145   | 3.05E-05         | IL6R              |
| 1               | 161,467,042                           | rs12746613  | 4.33E-06         | FCGR2B            |
| 1               | 167,411,384                           | rs864537    | 2.20E-11         | CD247             |
| 1               | 198,700,442                           | rs10919563  | 1.25E-10         | PTPRC             |
| 2               | 61,136,129                            | rs13031237  | 2.18E-06         | REL               |
| 2               | 65,595,586                            | rs934734    | 1.44E-01         | SPRED2            |
| 2               | 100,806,940                           | rs11676922  | 5.37E-01         | AFF3              |
| 2               | 191,935,804                           | rs10168266  | 9.61E-09         | STAT4             |
| 2               | 204,610,396                           | rs1980422   | 2.77E-12         | CD28              |
| 2               | 204,738,919                           | rs3087243   | 1.42E-11         | ICOS              |
| 3               | 58,556,841                            | rs13315591  | 8.95E-01         | DNASE1L3          |
| 4               | 26,104,113                            | rs12506688  | 7.39E-01         | RBPJ              |
| 4               | 123,509,421                           | rs6822844   | 4.32E-09         | IL2               |
| 5               | 55,438,580                            | rs6859219   | 1.00E+00         | ANKRD55           |
| 5               | 102,608,924                           | rs2561477   | 9.36E-01         | GIN1              |
| 6               | 106,568,034                           | rs548234    | 1.80E-04         | PRDM1             |
| 6               | 138,002,637                           | rs10499194  | 2.12E-04         | TNFAIP3           |
| 6               | 159,482,521                           | rs394581    | 1.62E-05         | TAGAP             |
| 6               | 167,540,842                           | rs1571878   | 4.26E-07         | CCR6              |
| 7               | 128,594,183                           | rs10488631  | 3.26E-04         | IRF5              |
| 8               | 11,343,973                            | rs2736340   | 2.59E-02         | BLK               |
| 9               | 34,743,681                            | rs951005    | 9.60E-06         | CCL21             |
| 9               | 123,640,500                           | rs1953126   | 2.08E-06         | TRAF1             |
| 10              | 6,099,045                             | rs2104286   | 4.41E-10         | IL2RA             |
| 10              | 6,393,260                             | rs4750316   | 4.22E-08         | PRKCQ             |
| 10              | 8,095,340                             | rs2275806   | 7.26E-05         | GATA3             |
| 10              | 63,800,004                            | rs12764378  | 8.84E-01         | ARID5B            |
| 11              | 36,525,293                            | rs540386    | 6.71E-11         | RAG1              |
| 11              | 60,909,581                            | rs595158    | 3.99E-11         | CD5               |
| 11              | 118,611,781                           | rs10892279  | 9.19E-01         | DDX6              |
| 12              | 57,968,715                            | rs1678542   | 6.58E-01         | B4GALNT1          |
| 15              | 38,828,140                            | rs8043085   | 6.82E-08         | RASGRP1           |
| 15              | 69,991,417                            | rs8026898   | 9.43E-01         | KIF23             |
| 16              | 86,019,087                            | rs13330176  | 3.00E-07         | IRF8              |
| 17              | 38,040,763                            | rs2872507   | 2.47E-05         | IKZF3             |
| 19              | 10,295,433                            | rs4804493   | 7.51E-01         | DNMT1             |

|    |            |            |          |         |
|----|------------|------------|----------|---------|
| 20 | 44,734,310 | rs6032662  | 4.38E-10 | CD40    |
| 21 | 35,911,599 | rs2834512  | 1.97E-01 | RCAN1   |
| 21 | 36,715,761 | rs9979383  | 9.14E-02 | RUNX1   |
| 21 | 43,836,186 | rs11203203 | 1.06E-01 | UBASH3A |
| 22 | 21,982,892 | rs2298428  | 9.64E-01 | YDJC    |
| 22 | 37,544,810 | rs3218253  | 1.00E-08 | IL2RB   |

**Supplementary Table 6.** Results from a GRAIL analysis indicating the most likely RA susceptibility gene in regions associated at genome wide association levels.

| Locus    | Gene    | Index      |               |      |          |      | Secondary effect |               |      |          |      | LD with index (r <sup>2</sup> /D') | 1-SNP model Vs. 2-SNP | Haplotypic risk |        |      |
|----------|---------|------------|---------------|------|----------|------|------------------|---------------|------|----------|------|------------------------------------|-----------------------|-----------------|--------|------|
|          |         | SNP        | alleles (M/m) | MAF  | p        | OR   | SNP              | alleles (M/m) | MAF  | p        | OR   |                                    |                       | haplotype       | Freq.  | OR   |
| 2q33     | CD28    | rs1980422  | A/G           | 0.23 | 3.37E-09 | 1.15 | rs55686954       | G/A           | 0.04 | 4.27-E05 | 0.8  | 0.015/1.00                         | 3.27E-05              | AA              | 0.04   | base |
|          |         |            |               |      |          |      |                  |               |      |          |      |                                    |                       | AG              | 0.72   | 1.26 |
|          |         |            |               |      |          |      |                  |               |      |          |      |                                    |                       | GG              | 0.23   | 1.43 |
|          |         |            |               |      |          |      |                  |               |      |          |      |                                    |                       | GA              | 0.0002 | -    |
| 15q14    | RASGRP1 | rs8043085  | C/A           | 0.23 | 4.78E-12 | 1.18 | rs77397211       | A/G           | 0.07 | 1.13E-04 | 1.17 | 0.001/0.18                         | 1.25E-04              | CA              | 0.70   | base |
|          |         |            |               |      |          |      |                  |               |      |          |      |                                    |                       | CG              | 0.06   | 1.17 |
|          |         |            |               |      |          |      |                  |               |      |          |      |                                    |                       | AA              | 0.23   | 1.18 |
|          |         |            |               |      |          |      |                  |               |      |          |      |                                    |                       | AG              | 0.01   | 1.39 |
| 2p16-p15 | REL     | rs34695944 | A/G           | 0.37 | 8.54E-11 | 1.15 | rs78404002       | G/A           | 0.05 | 9.12E-05 | 0.78 | 0.023/0.93                         | 7.39E-05              | AA              | 0.04   | base |
|          |         |            |               |      |          |      |                  |               |      |          |      |                                    |                       | AG              | 0.58   | 1.2  |
|          |         |            |               |      |          |      |                  |               |      |          |      |                                    |                       | GG              | 0.38   | 1.36 |
|          |         |            |               |      |          |      |                  |               |      |          |      |                                    |                       | GA              | 0.005  | -    |
| 2q32     | STAT4   | rs7574865  | C/A           | 0.22 | 9.61E-09 | 1.15 | rs3024921        | T/A           | 0.06 | 6.66E-06 | 1.18 | 0.021/1.00                         | 5.27E-06              | CT              | 0.71   | base |
|          |         |            |               |      |          |      |                  |               |      |          |      |                                    |                       | AT              | 0.24   | 1.15 |
|          |         |            |               |      |          |      |                  |               |      |          |      |                                    |                       | CA              | 0.06   | 1.20 |
|          |         |            |               |      |          |      |                  |               |      |          |      |                                    |                       | AA              | 0      | -    |
| 6q23     | TNFAIP3 | rs6920220  | G/A           | 0.22 | 1.24E-14 | 1.20 | rs58721818       | G/A           | 0.03 | 4.36E-08 | 1.34 | 0.030/0.47                         | 5.80E-08              | GG              | 0.76   | base |
|          |         |            |               |      |          |      |                  |               |      |          |      |                                    |                       | AG              | 0.21   | 1.18 |
|          |         |            |               |      |          |      |                  |               |      |          |      |                                    |                       | GA              | 0.02   | 1.37 |
|          |         |            |               |      |          |      |                  |               |      |          |      |                                    |                       | AA              | 0.02   | 1.55 |
| 19p13    | TYK2    | rs34536443 | C/G           | 0.05 | 1.57E-14 | 0.63 | rs12720356       | A/C           | 0.10 | 1.22E-05 | 0.85 | 0.004/1.00                         | 1.02E-05              | CA              | 0.88   | base |
|          |         |            |               |      |          |      |                  |               |      |          |      |                                    |                       | CC              | 0.09   | 0.85 |
|          |         |            |               |      |          |      |                  |               |      |          |      |                                    |                       | GA              | 0.04   | 0.62 |
|          |         |            |               |      |          |      |                  |               |      |          |      |                                    |                       | GC              | 0      | -    |

**Supplementary Table 7:** Haplotype analysis of six loci with additional independent effects on ImmunoChip.

| Chr | POS         | Gene region | Lead SNP                | Low MAF SNP | MAF UNAFF   | MAF AFF     | P        | OR   | r <sup>2</sup> to lead | Location       | REG POT7X | CONS 17WAY |
|-----|-------------|-------------|-------------------------|-------------|-------------|-------------|----------|------|------------------------|----------------|-----------|------------|
| 2   | 61,320,107  | REL         | rs78404002 <sup>a</sup> | rs78404002  | 0.05        | <b>0.04</b> | 3.42E-05 | 0.83 | lead                   | INTRONIC       | 0.00      | 0.00       |
| 2   | 61,391,558  | REL         |                         | rs17008218  | 0.05        | <b>0.04</b> | 4.39E-05 | 0.83 | 1                      | INTRONIC       | 0.00      | 0.08       |
| 2   | 61,581,489  | REL         |                         | rs17009924  | 0.05        | <b>0.04</b> | 9.47E-05 | 0.84 | 0.92                   | INTRONIC       | 0.00      | 0.00       |
| 2   | 61,629,635  | REL         |                         | rs78534076  | 0.05        | <b>0.04</b> | 4.91E-05 | 0.83 | 0.93                   | INTERGENIC     | 0.00      | 0.03       |
| 2   | 204,294,760 | CTLA4       | rs55686954 <sup>a</sup> | rs55686954  | <b>0.04</b> | <b>0.03</b> | 1.20E-07 | 0.77 | lead                   | INTRONIC       | 0.15      | 0.00       |
| 6   | 138,178,293 | TNFAIP3     | rs58721818 <sup>a</sup> | rs117267050 | <b>0.03</b> | <b>0.04</b> | 6.31E-08 | 1.31 | 0.92                   | INTERGENIC     | 0.00      | 0.00       |
| 6   | 138,239,199 | TNFAIP3     |                         | rs5029949   | <b>0.03</b> | <b>0.04</b> | 3.51E-08 | 1.31 | 0.91                   | INTRONIC       | 0.00      | 0.01       |
| 6   | 138,269,057 | TNFAIP3     |                         | rs7752903   | <b>0.03</b> | <b>0.04</b> | 3.15E-08 | 1.32 | 0.95                   | INTERGENIC     | 0.00      | 0.006      |
| 6   | 138,272,082 | TNFAIP3     |                         | rs7749323   | <b>0.03</b> | <b>0.04</b> | 2.87E-08 | 1.32 | 0.95                   | INTERGENIC     | 0.00      | 0.00       |
| 6   | 138,284,130 | TNFAIP3     |                         | rs6932056   | <b>0.03</b> | <b>0.04</b> | 3.93E-06 | 1.30 | 0.95                   | INTERGENIC     | 0.00      | 0.003      |
| 6   | 138,285,393 | TNFAIP3     |                         | rs61117627  | <b>0.03</b> | <b>0.04</b> | 1.25E-08 | 1.34 | 1                      | INTERGENIC     | 0.006     | 0.00       |
| 6   | 138,285,432 | TNFAIP3     |                         | rs58721818  | <b>0.03</b> | <b>0.04</b> | 4.07E-09 | 1.34 | lead                   | INTERGENIC     | 0.11      | 0.035      |
| 19  | 10,288,721  | TYK2        | rs34536443              | rs74956615  | 0.06        | <b>0.04</b> | 5.21E-11 | 0.74 | 1                      | 3' UTR         | 0.00      | 0.998      |
| 19  | 10,324,118  | TYK2        |                         | rs34536443  | <b>0.05</b> | <b>0.03</b> | 2.70E-13 | 0.69 | lead                   | Non Synonymous | 0.39      | 0.19       |

**Supplementary Table 8:** Low MAF (<5%) SNPs (in either cases or controls) in strong LD ( $r^2 > 0.9$ ) with a lead SNP from ImmunoChip analysis.

<sup>a</sup>=Lead SNP reported for these regions is an independent affect in region after conditioning on most associated SNP

| GWAS                     |          |     |      |                       |      | IMMUNOCHIP |      |                         |      |                           |      | r <sup>2</sup> | D'   |
|--------------------------|----------|-----|------|-----------------------|------|------------|------|-------------------------|------|---------------------------|------|----------------|------|
| Index SNP                | GENE     | CHR | MAF  | P                     | OR   | Index SNP  | MAF  | P                       | OR   | GWAS index SNP            |      |                |      |
|                          |          |     |      |                       |      |            |      |                         |      | P                         | OR   |                |      |
| *rs13315591 <sup>a</sup> | PXK      | 3   | 0.09 | 4.6x10 <sup>-8</sup>  | 1.29 | rs35677470 | 0.08 | 1.7 X 10 <sup>-07</sup> | 1.19 | 0.28                      | 1.03 | 0.27           | 0.58 |
| rs10488631               | IRF5     | 7   | 0.11 | 4.2x10 <sup>-11</sup> | 1.19 | rs3807306  | 0.49 | 1.9 X 10 <sup>-07</sup> | 0.89 | 1.8 X 10 <sup>-05</sup>   | 1.1  | 0.2            | 1    |
| rs934734                 | SPRED2   | 2   | 0.49 | 5.3x10 <sup>-10</sup> | 1.13 | rs6546146  | 0.38 | 8.0 X 10 <sup>-07</sup> | 0.9  | 3.0 X 10 <sup>-04</sup> # | 1.07 | 0.53           | 0.95 |
| rs3761847                | TRAF1    | 9   | 0.43 | 2.1x10 <sup>-7</sup>  | 1.13 | rs10739580 | 0.33 | 1.7 X 10 <sup>-06</sup> | 1.12 | 1.7 X 10 <sup>-04</sup>   | 1.07 | 0.74           | 1    |
| rs2104286                | IL2RA    | 10  | 0.27 | 2x10 <sup>-3</sup>    | 0.92 | rs10795791 | 0.4  | 3.0 X 10 <sup>-06</sup> | 1.09 | 1.0 X 10 <sup>-04</sup> # | 0.91 | 0.25           | 1    |
| rs11586238               | CD2      | 1   | 0.24 | 1x10 <sup>-5</sup>    | 1.13 | rs798000   | 0.34 | 6.2 X 10 <sup>-06</sup> | 1.11 | 3.0 X 10 <sup>-03</sup> # | 1.07 | 0.33           | 0.72 |
| rs10919563               | PTPRC    | 1   | 0.13 | 2x10 <sup>-4</sup>    | 0.88 | rs2014863  | 0.36 | 2.1 X 10 <sup>-05</sup> | 1.09 | 7.7 X 10 <sup>-04</sup>   | 0.91 | 0.07           | 1    |
| rs1678542                | KIF5A    | 12  | 0.38 | 2x10 <sup>-4</sup>    | 0.91 | rs10683701 | 0.33 | 2.3 X 10 <sup>-05</sup> | 0.9  | 1.0 X 10 <sup>-03</sup> # | 0.93 | 0.27           | 0.58 |
| rs548234                 | PRDM1    | 6   | 0.33 | 9.7x10 <sup>-5</sup>  | 1.1  | rs6911690  | 0.12 | 1.2 X 10 <sup>-04</sup> | 0.87 | 0.02                      | 1.04 | 0.1            | 1    |
| rs6822844                | IL2-IL21 | 4   | 0.18 | 7x10 <sup>-4</sup>    | 0.9  | rs78560100 | 0.07 | 5.8 X 10 <sup>-04</sup> | 1.13 | 0.01                      | 0.94 | 0.02           | 1    |
| *rs540386 <sup>b</sup>   | TRAF6    | 11  | 0.14 | 3x10 <sup>-4</sup>    | 0.88 | rs570676   | 0.38 | 2.1 X 10 <sup>-03</sup> | 0.93 | 0.07                      | 0.95 | 0.18           | 1    |

**Supplementary Table 9:** Comparison of lead SNPs for previously confirmed RA loci identified by GWAS and ImmunoChip analysis where the focus of association has moved ( $r^2 < 0.8$ ). \*Actual SNP not found on ImmunoChip. Perfect proxy ( $r^2$  and  $D' = 1$ ) used for ImmunoChip comparison <sup>a</sup> = rs9813011 <sup>b</sup> = rs5030437. # = Result from ACPA positive analysis

| Gene                  | Chr         | Before Immunochip           |                | SNP                           | LD region<br>$r^2 > 0.9^*$          | Results from Immunochip |                                              |                                   | Localization of<br>LD region ( $r^2 > 0.9$ )<br>relative<br>to nearest genes |
|-----------------------|-------------|-----------------------------|----------------|-------------------------------|-------------------------------------|-------------------------|----------------------------------------------|-----------------------------------|------------------------------------------------------------------------------|
|                       |             | 0.1cM<br>localisation       | Region<br>size |                               |                                     | Region<br>size          | All SNPS<br>(ns) in<br>$r^2 > 0.9$<br>region | LD<br>SNPS<br>(ns)<br>$r^2 > 0.9$ |                                                                              |
| <i>PTPN22</i>         | 1p13        | 113,863,087-<br>114,527,968 | 665kb          | <b>rs2476601<sup>b</sup></b>  | 114,303,808-<br>114,377,568         | 73.76kb                 | 682 (27)                                     | 2 (1)                             | Complete RSBN1;<br>Exon 14<br>to 52.62kb 3'<br>of PTPN22                     |
| <i>ANKRD55</i>        | 5q11        | 55,414,956-<br>55,447,909   | 33kb           | <b>rs71624119<sup>a</sup></b> | 55,440,730-<br>55,442,249           | 1.52kb                  | 19 (0)                                       | 2 (0)                             | Intron 6 of ANKRD55                                                          |
| <i>TNFAIP3</i>        | 6q23        | 137,896,596-<br>138,125,335 | 229kb          | <b>rs6920220<sup>b</sup></b>  | 137,959,235-<br>138,006,504         | 47.27kb                 | 761 (0)                                      | 9 (0)                             | 181.85kb 5' of TNFAIP3                                                       |
| <b><i>TNFAIP3</i></b> | <b>6q23</b> | 137,896,596-<br>138,125,335 | 229kb          | <b>rs58721818<sup>g</sup></b> | <b>138,178,293-<br/>138,243,739</b> | <b>65.45kb</b>          | <b>835 (38)</b>                              | <b>7 (0)</b>                      | <b>TNFAIP3</b>                                                               |
| <i>RBPJ</i>           | 4p15        | 26,028,805-<br>26,134,465   | 106kb          | <b>rs932036<sup>a</sup></b>   | 26,085,480-<br>26,128,710           | 43.23kb                 | 486 (0)                                      | 25 (0)                            | 36.37kb 5' of RBPJ                                                           |
| <i>CCR6</i>           | 6q27        | 167,355,854-<br>167,547,954 | 192kb          | <b>rs59466457<sup>b</sup></b> | 167,526,096-<br>167,540,842         | 14.75kb                 | 234 (0)                                      | 6 (0)                             | Intron 1 of CCR6                                                             |
| <i>STAT4</i>          | 2q32        | 191,873,553-<br>192,007,734 | 134kb          | <b>rs13426947<sup>a</sup></b> | 191,900,449-<br>191,935,804         | 35.36kb                 | 398 (11)                                     | 10 (0)                            | Intron 5 to 18 of STAT4                                                      |
| <b><i>STAT4</i></b>   | <b>2q32</b> | 191,873,553-<br>192,007,734 | 134kb          | <b>rs932169<sup>e</sup></b>   | <b>191,929,278-<br/>191,929,278</b> | <b>1bp</b>              | <b>1 (0)</b>                                 | <b>1 (0)</b>                      | <b>Intron 8 of STAT4</b>                                                     |

a) Known loci on Immunochip

|              |             |                             |       |                               |                             |          |           |        |                                                                                                                                            |
|--------------|-------------|-----------------------------|-------|-------------------------------|-----------------------------|----------|-----------|--------|--------------------------------------------------------------------------------------------------------------------------------------------|
|              |             | 192,007,734                 |       |                               |                             |          |           |        |                                                                                                                                            |
| <i>CCL21</i> | 9p13        | 34,649,442-<br>34,974,974   | 325kb | <b>rs2812378<sup>b</sup></b>  | 34,707,373-<br>34,710,338   | 2.97kb   | 41 (4)    | 3 (0)  | CCL21                                                                                                                                      |
| <i>CD40</i>  | 20q13       | 44,594,228-<br>44,784,336   | 190kb | <b>rs6032662<sup>b</sup></b>  | 44,730,245-<br>44,747,947   | 17.70kb  | 239 (1)   | 10 (0) | 16.67kb 5' to intron 1 of<br>CD40                                                                                                          |
| <i>MMEL1</i> | 1p36        | 2,406,888-<br>2,785,671     | 378kb | <b>rs2843401<sup>b</sup></b>  | 2,516,781-<br>2,709,164     | 192.38kb | 4571 (73) | 85 (1) | Complete MMEL1,<br>C1ORF93; TTC34                                                                                                          |
| <i>AFF3</i>  | 2q11        | 100,544,954-<br>101,038,647 | 493kb | <b>rs10209110<sup>a</sup></b> | 100,640,432-<br>100,730,111 | 89.68kb  | 990 (2)   | 18 (0) | 5' region to<br>intron 2 of AFF3                                                                                                           |
| <i>REL</i>   | 2p16        | 60,914,729-<br>61,864,047   | 949kb | <b>rs34695944<sup>b</sup></b> | 61,072,664-<br>61,164,331   | 91.67kb  | 876 (18)  | 14 (0) | Complete REL                                                                                                                               |
| <b>REL</b>   | <b>2p16</b> | 60,914,729-<br>61,864,047   | 949kb | <b>rs78404002<sup>g</sup></b> | 61,466,603-<br>61,776,131   | 309.53kb | 3579 (24) | 5 (0)  | <b>78.23kb 5' to<br/>intron 53 of<br/>USP34; SNORA70B;<br/>XPO1;<br/>315.96kb 3' of REL<br/>236bp 3' of CTLA4;<br/>56.47kb 5' of ICOS;</b> |
| <i>CTLA4</i> | 2q33        | 204,678,417-<br>204,816,382 | 138kb | <b>rs11571302<sup>b</sup></b> | 204,738,919-<br>204,745,003 | 6.08kb   | 83 (0)    | 4 (0)  |                                                                                                                                            |
| <i>GIN1</i>  | 5q21        | 102,098,582-<br>102,711,659 | 613kb | <b>rs39984<sup>a</sup></b>    | 102,595,778-<br>102,625,335 | 29.56kb  | 385 (7)   | 40 (0) | Intron 1 to 10.97kb 3'<br>of C5orf30;<br>139.92kb 5' of GIN1                                                                               |
| <i>PXK</i>   | 3p14        | 58,154,177-<br>58,549,297   | 395kb | <b>rs35677470<sup>a</sup></b> | 58,181,499-<br>58,183,636   | 2.14kb   | 37 (2)    | 2 (1)  | Exon 8 to intron 9<br>of DNASE1L3;<br>134.97kb 5' of PXK                                                                                   |
| <i>IRF5</i>  | 7q32        | 128,549,568-                | 228kb | <b>rs3807306<sup>b</sup></b>  | 128,580,680-<br>128,580,680 | 1bp      | 1 (0)     | 1 (0)  | Intron 1 of IRF5                                                                                                                           |

|               |             |                             |       |                               |                             |         |          |        |                                                          |
|---------------|-------------|-----------------------------|-------|-------------------------------|-----------------------------|---------|----------|--------|----------------------------------------------------------|
|               |             | 128,777,520                 |       |                               |                             |         |          |        |                                                          |
| <i>IL2RB</i>  | 22q12       | 37,537,514-<br>37,562,111   | 24kb  | <b>rs3218251<sup>b</sup></b>  | 37,544,245-<br>37,545,505   | 1.26kb  | 24 (0)   | 5 (0)  | Intron 1 of <i>IL2RB</i>                                 |
| <i>DDX6</i>   | 11q23       | 118,341,921-<br>118,765,600 | 423kb | <b>rs4938573<sup>b</sup></b>  | 118,662,993-<br>118,745,884 | 82.89kb | 1169 (0) | 48 (0) | Complete <i>SETP16</i> ;<br>1.14kb 5' of <i>DDX6</i>     |
| <i>SPRED2</i> | 2p14        | 65,397,595-<br>65,717,094   | 319kb | <b>rs6546146<sup>b</sup></b>  | 65,556,324-<br>65,598,300   | 41.98kb | 585 (7)  | 13 (0) | Intron 1 to intron 4<br>of <i>SPRED2</i>                 |
| <i>TAGAP</i>  | 6q25        | 159,340,939-<br>159,541,830 | 201kb | <b>rs629326<sup>b</sup></b>   | 159,489,791-<br>159,496,713 | 6.92kb  | 90 (0)   | 3 (0)  | 23.61kb 5' of <i>TAGAP</i>                               |
| <i>TRAF1</i>  | 9q33        | 123,351,121-<br>124,131,512 | 780kb | <b>rs10739580<sup>b</sup></b> | 123,640,500-<br>123,708,286 | 67.79kb | 920 (21) | 75 (0) | Complete <i>TRAF1</i>                                    |
| <i>IL2RA</i>  | 10p15       | 6,030,243-<br>6,161,781     | 131kb | <b>rs10795791<sup>a</sup></b> | 6,106,266-<br>6,108,340     | 2.08kb  | 29 (0)   | 4 (0)  | 1.93kb 5' of <i>IL2RA</i>                                |
| <i>BLK</i>    | 8p23        | 11,285,384-<br>11,414,013   | 128kb | <b>rs4840565<sup>a</sup></b>  | 11,338,383-<br>11,352,485   | 14.10kb | 267 (0)  | 5 (0)  | 13.13kb 5' to<br>intron 1 of <i>BLK</i>                  |
| <i>CD2</i>    | 1p13        | 117,231,902-<br>117,299,420 | 67kb  | <b>rs798000<sup>b</sup></b>   | 117,280,696-<br>117,280,696 | 1bp     | 2 (0)    | 1 (0)  | 16.31kb 5' of <i>CD2</i>                                 |
| <i>CD28</i>   | 2q33        | 204,446,380-<br>204,690,355 | 244kb | <b>rs1980422<sup>f</sup></b>  | 204,610,004-<br>204,634,569 | 24.57kb | 314 (0)  | 7 (0)  | 7.45kb 3' of <i>CD28</i> ;<br>97.94kb 5' of <i>CTLA4</i> |
| <b>CD28</b>   | <b>2q33</b> | 204,446,380-<br>204,690,355 | 244kb | <b>rs55686954</b>             | 204,586,515-<br>204,586,515 | 1bp     | 1(0)     | 1(0)   | Intron 1 of <i>CD28</i> ;<br>145.99kb 5' of <i>CTLA4</i> |



|                             |              |                             |         |                               |                                   |               |               |               |                                                                                        |
|-----------------------------|--------------|-----------------------------|---------|-------------------------------|-----------------------------------|---------------|---------------|---------------|----------------------------------------------------------------------------------------|
| <i>PTPRC</i>                | 1q31         | 197,311,228-<br>197,938,330 | 627kb   | <b>rs2014863<sup>a</sup></b>  | 198,791,907-<br>198,810,008       | 18.10kb       | 175 (0)       | 6 (0)         | 65.36kb 3' of PTPRC                                                                    |
| <i>KIF5A</i>                | 12q13        | 57,626,582-<br>58,124,534   | 497kb   | <b>rs10683701<sup>b</sup></b> | 58,034,835-<br>58,105,094         | 70.26kb       | 945 (8)       | 104 (0)       | snoU13;52.90kb 5' to<br>intron 5 of OS9;<br>54.42kb 3' of KIF5A<br>78.66kb 3' of PRKCQ |
| <i>PRKCQ</i>                | 10p15        | 6,388,071-<br>6,545,104     | 157kb   | <b>rs947474<sup>a</sup></b>   | 6,390,450-<br>6,390,450           | 1bp           | 1 (0)         | 1 (0)         |                                                                                        |
| <i>FCGR2A</i>               | 1q23         | 161,282,384-<br>161,679,644 | 397kb   | <b>rs10494360<sup>b</sup></b> | 161,463,876-<br>161,480,649       | 16.77kb       | 230 (13)      | 17 (0)        | 11.34kb 5' to<br>exon 5 of FCGR2A                                                      |
| <i>PRDM1</i>                | 6q21         | 106,532,756-<br>106,627,910 | 95kb    | <b>rs6911690<sup>b</sup></b>  | 106,435,981-<br>106,508,640       | 72.66kb       | 831 (0)       | 59 (0)        | 25.55kb 5'<br>of PRDM1                                                                 |
| <i>IL2-IL21</i>             | 4q27         | 122,982,314-<br>123,565,302 | 583kb   | <b>rs78560100<sup>a</sup></b> | 123,030,583-<br>123,503,591       | 473.01kb      | 5420 (73)     | 119 (0)       | KIAA1109;ADAD1;IL2;<br>30.19kb 3' of IL21                                              |
| <i>TRAF6</i>                | 11p12        |                             |         | <b>rs570676<sup>b</sup></b>   | 36,486,064-<br>36,519,624         | 33.56kb       | 434 (14)      | 11 (0)        | Intron 3 to 22.51kb<br>3' of TRAF6                                                     |
| b) Novel loci on Immunochip |              |                             |         |                               |                                   |               |               |               |                                                                                        |
| <i>TYK2</i>                 | 19p13        | 10,396,336-<br>10,628,468   | 232kb   | <b>rs34536443<sup>b</sup></b> | 10,427,721-<br>10,492,274         | 64.55kb       | 973 (124)     | 3 (1)         | 47.96kb 5' to exon 13<br>of RAVER1; complete ICAM3;<br>complete TYK2                   |
| <b>TYK2</b>                 | <b>19p13</b> | 10,396,336-<br>10,628,468   | 232kb   | <b>rs3176767<sup>g</sup></b>  | <b>10,446,897-<br/>10,449,778</b> | <b>2.88kb</b> | <b>58 (8)</b> | <b>16 (1)</b> | <b>Intron 1 to intron 2<br/>of ICAM3; 11.43kb 3' of TYK2</b>                           |
| <i>IRAK1</i>                | Xq28         | 153,170,618-<br>154,445,759 | 1,275kb | <b>rs13397<sup>b</sup></b>    | 153,196,345-<br>153,248,248       | 51.9kp        | 406 (52)      | 3 (0)         | 5' to exon 2 of TMEM187;<br>HCFC1;<br>25kb 3' of IRAK1                                 |

|                                 |              |                         |         |                                                     |                              |            |              |              |                                                |
|---------------------------------|--------------|-------------------------|---------|-----------------------------------------------------|------------------------------|------------|--------------|--------------|------------------------------------------------|
| <i>TLE3</i> <sup>#</sup>        | 15q23        |                         |         | <b>rs8026898</b> <sup>b</sup>                       | 69,984,462-70,010,647        | 26.19kb    | 376 (0)      | 6 (0)        | 329.48kb 3' of TLE3                            |
| <i>RASGRP1</i>                  | 15q14        | 38,814,377-38,972,177   | 157kb   | <b>rs8043085</b> <sup>b</sup>                       | 38,828,140-38,844,106        | 15.97kb    | 192 (0)      | 4 (0)        | Intron 2 of RASGRP1;                           |
| <b><i>RASGRP1</i></b>           | <b>15q14</b> | 38,814,377-38,972,177   | 157kb   | <b>rs77397211</b> <sup>f</sup>                      | <b>38,970,496-38,970,496</b> | <b>1bp</b> | <b>1 (0)</b> | <b>1 (0)</b> | <b>112.72kb 5' of RASGRP1</b>                  |
| <i>PADI4</i>                    | 1p36         | 17,597,181-17,679,598   | 82kb    | <b>rs2240336</b> <sup>b</sup>                       | 17,673,102-17,674,402        | 1.30kb     | 19 (0)       | 3 (0)        | Intron 9 PADI4                                 |
| <i>IL6R</i>                     | 1q21         | 155,019,710-156,045,183 | 1,025kb | <b>rs8192284</b> <sup>a</sup><br>(rs2228145)        | 154,418,749-154,428,283      | 9.54kb     | 132 (4)      | 10 (1)       | Intron 6 to intron 9 of IL6R                   |
| <i>IRF8</i>                     | 16q24        | 85,993,580-86,024,104   | 30kb    | <b>rs13330176</b> <sup>b</sup>                      | 86,016,026-86,019,087        | 3.06kb     | 56 (0)       | 4 (0)        | 59.83kb 3' of IRF8                             |
| <hr/>                           |              |                         |         |                                                     |                              |            |              |              |                                                |
| (c) Novel loci adding GWAS data |              |                         |         |                                                     |                              |            |              |              |                                                |
| <i>ARID5B</i> <sup>#</sup>      | 10q21        |                         |         | <b>rs12764378</b> <sup>d</sup>                      | 63,786,554-63,800,004        | 13.45kb    | 164 (0)      | 4 (0)        | Intron 4 of ARID5B                             |
| <i>RUNX1</i> <sup>#</sup>       | 21q22        |                         |         | <b>rs9979383</b> <sup>c</sup>                       | 36,712,588-36,715,761        | 3.17kb     | 62 (0)       | 3 (0)        | 5' region of RUNX1                             |
| <i>IKZF3</i>                    | 17q12        | 37,382,674-38,240,216   | 857kb   | <b>rs12936409/</b><br><b>rs2872507</b> <sup>c</sup> | 37,912,377-38,080,912        | 168.54kb   | 1935 (70)    | 49 (1)       | IKZF3;GSDMB; Intron 1 to 164.92kb 3' of ORMDL3 |
| <i>POU3F1</i> <sup>#</sup>      | 1p34         |                         |         | <b>rs883220</b> <sup>d</sup>                        | 38,614,867-38,644,861        | 30.00kb    | 427 (0)      | 9 (0)        | 102.42kb 5' of POU3F1                          |
| <i>RCAN1</i> <sup>#</sup>       | 21q22        |                         |         | <b>rs2834512</b> <sup>d</sup>                       | 35,909,625-35,930,915        | 21.29kb    | 370 (0)      | 13 (0)       | Intron 1 of RCAN1                              |
| <i>CD5</i>                      | 11q12        | 60,723,898-             | 112kb   | <b>rs595158</b> <sup>c</sup>                        | 60,888,001-                  | 34.63kb    | 475 (35)     | 30 (1)       | Intron 5 to 27.31kb 3'                         |

|                           |       |            |                               |            |                         |        |        |       |                                                                              |
|---------------------------|-------|------------|-------------------------------|------------|-------------------------|--------|--------|-------|------------------------------------------------------------------------------|
| <i>GATA3</i> <sup>#</sup> | 10p14 | 60,836,519 | <b>rs2275806</b> <sup>d</sup> | 60,922,634 | 8,095,340-<br>8,097,368 | 2.03kb | 36 (0) | 2 (0) | of CD5; Intron 1<br>to 9.73kb 3' of VPS37C<br>227bp 5' to exon 2<br>of GATA3 |
|---------------------------|-------|------------|-------------------------------|------------|-------------------------|--------|--------|-------|------------------------------------------------------------------------------|

**Supplementary Table 10.** Localisation of association signals from GWAS and ImmunoChip for non-HLA RA loci. Previously identified loci are shown with the most significantly associated SNP on ImmunoChip (2a). Novel loci are shown with either the best SNP on ImmunoChip (Table 2b), if  $<5 \times 10^{-8}$ , or from the most associated SNP from the combined analysis of GWAS and ImmunoChip data (2c). <sup>a</sup> indicates the data is from all RA samples on ImmunoChip, <sup>b</sup> is data from ImmunoChip for ACPA positive individuals, <sup>c</sup> is data from adding GWAS samples and RA ImmunoChip data and <sup>d</sup> is from ACPA positive ImmunoChip and GWAS data. SNPs in **bold** represent secondary effects at loci. Secondary effects are defined as  $p < 5 \times 10^{-4}$ , with low evidence of LD between SNPs ( $r^2 < 0.05$ ), MAF > 1%, and a p value that didn't vary substantially on conditioning. <sup>e</sup>, <sup>f</sup> and <sup>g</sup> indicate secondary effects where the effect was seen in ImmunoChip data from all samples, ACPA positive samples or both respectively. \*co-ordinates based on GRCh37 assembly. <sup>#</sup>region not included for dense mapping on ImmunoChip

| REGION                                                                                     | SNP        | CHR | POS         | r <sup>2</sup> with index SNP | Location        | REGPOT7X | CONS<br>17WAY | MAF  |
|--------------------------------------------------------------------------------------------|------------|-----|-------------|-------------------------------|-----------------|----------|---------------|------|
| Intergenic SNPs with the strongest evidence for regulatory potential                       |            |     |             |                               |                 |          |               |      |
| rs10739580 TRAF1                                                                           | rs1930786  | 9   | 122,731,290 | 1.00                          | UPSTREAM        | 0.798    | 0.000         | 0.44 |
| rs4840565 BLK                                                                              | rs922483   | 8   | 11,389,321  | 0.97                          | 5' UTR          | 0.511    | 0.005         | 0.33 |
| rs6032662 CD40                                                                             | rs1883832  | 20  | 44,180,389  | 1.00                          | 5' UTR          | 0.486    | 0.000         | 0.26 |
| rs10739580 TRAF1                                                                           | rs881375   | 9   | 122,692,719 | 0.97                          | INTERGENIC      | 0.407    | 0.800         | 0.43 |
| rs39984 GIN1                                                                               | rs2288787  | 5   | 102,628,605 | 1.00                          | INTRONIC        | 0.399    | 0.024         | 0.34 |
| Intergenic SNPs with the strongest evidence for conservation                               |            |     |             |                               |                 |          |               |      |
| rs6911690 PRDM1                                                                            | rs9320143  | 6   | 106,542,674 | 0.96                          | INTERGENIC      | 0.342    | 1.000         | 0.13 |
| rs12936409 IKZF3                                                                           | rs12946510 | 17  | 35,165,903  | 0.90                          | DOWNSTREAM      | 0.341    | 1.000         | 0.49 |
| rs6911690 PRDM1                                                                            | rs9399967  | 6   | 106,606,016 | 1.00                          | INTERGENIC      | 0.264    | 1.000         | 0.13 |
| rs10683701 KIF5A                                                                           | rs774891   | 12  | 56,354,838  | 0.95                          | NON-CODING GENE | 0.209    | 1.000         | 0.33 |
| rs78560100 IL2-IL21                                                                        | rs62323937 | 4   | 123,337,405 | 0.96                          | INTRONIC        | 0.000    | 1.000         | 0.08 |
| rs12764378 ARID5B                                                                          | rs12764378 | 10  | 63,470,010  | Index                         | INTRONIC        | 0.000    | 1.000         | 0.18 |
| rs6911690 PRDM1                                                                            | rs9373828  | 6   | 106,594,709 | 1.00                          | INTERGENIC      | 0.148    | 0.998         | 0.12 |
| rs6911690 PRDM1                                                                            | rs7756056  | 6   | 106,594,631 | 1.00                          | INTERGENIC      | 0.082    | 0.998         | 0.12 |
| rs34536443 TYK2                                                                            | rs74956615 | 19  | 10,288,721  | 1.00                          | 3' UTR          | 0.000    | 0.998         | 0.02 |
| Intergenic snps with evidence for both conservation (>0.5) and regulatory potential (>0.1) |            |     |             |                               |                 |          |               |      |
| rs6911690 PRDM1                                                                            | rs9320143  | 6   | 106,542,674 | 0.96                          | INTERGENIC      | 0.342    | 1.000         | 0.13 |
| rs12936409 IKZF3                                                                           | rs12946510 | 17  | 35,165,903  | 0.90                          | DOWNSTREAM      | 0.341    | 1.000         | 0.49 |
| rs6911690 PRDM1                                                                            | rs9399967  | 6   | 106,606,016 | 1.00                          | INTERGENIC      | 0.264    | 1.000         | 0.13 |
| rs10683701 KIF5A                                                                           | rs774891   | 12  | 56,354,838  | 0.95                          | NON-CODING GENE | 0.209    | 1.000         | 0.33 |
| rs6911690 PRDM1                                                                            | rs9373828  | 6   | 106,594,709 | 1.00                          | INTERGENIC      | 0.148    | 0.998         | 0.12 |

|                     |            |    |             |      |            |       |       |      |
|---------------------|------------|----|-------------|------|------------|-------|-------|------|
| rs12936409 IKZF3    | rs10445308 | 17 | 35,191,573  | 0.94 | INTRONIC   | 0.169 | 0.989 | 0.48 |
| rs34695944 REL      | rs13017599 | 2  | 61,017,835  | 1.00 | DOWNSTREAM | 0.231 | 0.978 | 0.37 |
| rs34695944 REL      | rs67574266 | 2  | 60,962,333  | 1.00 | 5' UTR     | 0.345 | 0.975 | 0.37 |
| rs78560100 IL2 IL21 | rs62321698 | 4  | 123,500,153 | 0.95 | INTRONIC   | 0.221 | 0.973 | 0.07 |
| rs6920220 TNFAIP3   | rs6927172  | 6  | 138,043,868 | 1.00 | INTERGENIC | 0.229 | 0.965 | 0.16 |
| rs78560100 IL2 IL21 | rs79212788 | 4  | 123,648,588 | 0.93 | INTERGENIC | 0.108 | 0.933 | 0.08 |
| rs39984 GIN1        | rs556560   | 5  | 102,651,823 | 0.91 | INTERGENIC | 0.175 | 0.818 | 0.36 |
| rs10739580 TRAF1    | rs881375   | 9  | 122,692,719 | 0.97 | INTERGENIC | 0.407 | 0.800 | 0.43 |
| rs12936409 IKZF3    | rs9891174  | 17 | 35,285,328  | 1.00 | INTRONIC   | 0.101 | 0.531 | 0.47 |

**Supplementary Table 11.** Intergenic potential causal SNPs. Intergenic SNPs in strong LD ( $r^2 > 0.9$ ) with a lead SNP on Immunochip with evidence for either strong regulatory potential (regpot7x  $> 0.35$ ) or conservation (cons17way  $> 0.998$ ), or evidence for both (regpot7x  $> 0.1$ , cons17way  $> 0.5$ ).

| Gene1   | SNP1       | Gene2   | SNP 2      | p-value  | Z-score |
|---------|------------|---------|------------|----------|---------|
| MMEL    | rs2843401  | FCGR2A  | rs11810143 | 1.73E-05 | 4.297   |
| PRKCQ   | rs947474   | GATA3   | rs2275806  | 8.33E-05 | 3.935   |
| PTPN22  | rs2476601  | RBPJ    | rs12506688 | 1.44E-04 | 3.802   |
| PADI4   | rs2240336  | TAGAP   | rs629326   | 3.26E-04 | 3.594   |
| ANKRD55 | rs71624119 | TRAF6   | rs570676   | 4.76E-04 | 3.494   |
| CTLA4   | rs11571302 | RASGRP1 | rs8043085  | 4.89E-04 | 3.487   |

**Supplementary Table 12.** Pairwise interactions remaining statistically significant after Bonferroni correction.

| Gene                          | Top variant(s)<br>Celiac disease                 | MAF* | P<br>Celiac             | OR<br>Celiac | Top Variant(s)<br>RA                    | MAF*         | P<br>RA                                           | OR<br>RA     | P for Celiac<br>SNP in<br>RA iChip | OR for Celiac<br>SNP in RA<br>iChip | r <sup>2</sup> | D'           |
|-------------------------------|--------------------------------------------------|------|-------------------------|--------------|-----------------------------------------|--------------|---------------------------------------------------|--------------|------------------------------------|-------------------------------------|----------------|--------------|
| <i>MMEL1</i> <sup>a</sup>     | <b>rs4445406</b>                                 | 0.34 | 5.4 × 10 <sup>-12</sup> | 0.87         | <b>rs2843401</b>                        | 0.33         | 6.6 × 10 <sup>-9</sup>                            | 0.87         | 1.6 × 10 <sup>-5</sup>             | 0.92                                | 0.88           | 0.96         |
| <i>REL/PUS10</i> <sup>a</sup> | <b>rs13003464</b>                                | 0.39 | 4.3 × 10 <sup>-16</sup> | 1.17         | <b>rs34695944</b><br><b>rs78404002</b>  | 0.37<br>0.05 | 2.6 × 10 <sup>-8</sup><br>3.4 × 10 <sup>-5</sup>  | 1.13<br>0.85 | 0.5                                | 0.99                                | 0.02<br>0.06   | 0.16<br>1    |
| <i>STAT4</i> <sup>a</sup>     | <b>rs6715106</b>                                 | 0.06 | 8.4 × 10 <sup>-9</sup>  | 0.79         | <b>rs13426947a</b><br><b>rs932169b</b>  | 0.19<br>0.09 | 7.2 × 10 <sup>-10</sup><br>6.6 × 10 <sup>-6</sup> | 1.15<br>1.16 | 3.5 × 10 <sup>-4</sup>             | 0.86                                | 0.02<br>0.004  | 1<br>1       |
| <i>STAT4</i>                  | <b>Signal 2 rs6752770</b>                        | 0.29 | 1.3 × 10 <sup>-6</sup>  | 1.10         | <b>rs13426947a</b><br><b>rs932169b</b>  | 0.19<br>0.09 | 7.2 × 10 <sup>-10</sup><br>6.6 × 10 <sup>-6</sup> | 1.15<br>1.16 | 1.3 × 10 <sup>-3</sup>             | 1.07                                | 0.15<br>0.01   | 0.45<br>0.34 |
| <i>STAT4</i>                  | <b>Signal 3 rs12998748</b>                       | 0.12 | 2.6 × 10 <sup>-4</sup>  | 0.90         | <b>rs13426947a</b><br><b>rs932169b</b>  | 0.19<br>0.09 | 7.2 × 10 <sup>-10</sup><br>6.6 × 10 <sup>-6</sup> | 1.15<br>1.16 | 5 × 10 <sup>-3</sup>               | 0.92                                | 0.03<br>0.005  | 1<br>1       |
| <i>CD28</i> <sup>a</sup>      | <b>rs1980422</b>                                 | 0.23 | 1.4 × 10 <sup>-15</sup> | 1.19         | <b>rs11571302a</b><br><b>rs1980422b</b> | 0.48<br>0.23 | 4.5 × 10 <sup>-8</sup><br>8.7 × 10 <sup>-6</sup>  | 0.89<br>1.12 | 8.7 × 10 <sup>-6</sup>             | 1.11                                | 0.006<br>1     | 0.14<br>1    |
| <i>CTLA4</i>                  | <b>Signal 2 rs34037980</b>                       | 0.22 | 1.6 × 10 <sup>-5</sup>  | 0.91         | <b>rs11571302a</b><br><b>rs1980422b</b> | 0.48<br>0.23 | 4.5 × 10 <sup>-8</sup><br>8.7 × 10 <sup>-6</sup>  | 0.89<br>1.12 | 1.6 × 10 <sup>-3</sup>             | 0.93                                | 0.21<br>0      | 1<br>0.02    |
| <i>CD28</i>                   | <b>Signal 3 rs10207814</b>                       | 0.04 | 1.3 × 10 <sup>-4</sup>  | 1.20         | <b>rs11571302a</b><br><b>rs1980422b</b> | 0.48<br>0.23 | 4.5 × 10 <sup>-8</sup><br>8.7 × 10 <sup>-6</sup>  | 0.89<br>1.12 | 0.8                                | 1.01                                | 0.05<br>0.01   | 1<br>1       |
| <i>IL2_IL21</i> <sup>a</sup>  | <b>rs13132308</b>                                | 0.16 | 1.9 × 10 <sup>-38</sup> | 0.71         | <b>rs78560100</b>                       | 0.07         | 5.8 × 10 <sup>-4</sup>                            | 1.13         | 0.01                               | 0.94                                | 0.02           | 0.99         |
| <i>IL2_IL21</i>               | <b>Signal 2 rs62323881</b>                       | 0.07 | 8.6 × 10 <sup>-5</sup>  | 1.15         | <b>rs78560100</b>                       | 0.07         | 5.8 × 10 <sup>-4</sup>                            | 1.13         | 9 × 10 <sup>-4</sup>               | 1.12                                | 1              | 1            |
| <i>BACH2</i> <sup>b</sup>     | <b>rs7753008</b>                                 | 0.38 | 2.7 × 10 <sup>-7</sup>  | 1.10         | <b>rs72928038</b>                       | 0.18         | 8.2 × 10 <sup>-7</sup>                            | 1.13         | 7.8 × 10 <sup>-3</sup>             | 1.05                                | 0.2            | 0.86         |
| TNFAIP3 <sup>a</sup>          | <b>rs17264332</b>                                | 0.21 | 5.0 × 10 <sup>-30</sup> | 1.29         | <b>rs6920220a</b><br><b>rs58721818b</b> | 0.2<br>0.03  | 2.3 × 10 <sup>-13</sup><br>1.2 × 10 <sup>-8</sup> | 1.2<br>1.38  | 2.4 × 10 <sup>-10</sup>            | 1.15                                | 1<br>0.03      | 1<br>0.47    |
| TNFAIP3                       | <b>Signal 2 [imm_6_138043754]<br/>rs77027760</b> | 0.19 | 2.1 × 10 <sup>-7</sup>  | 0.88         | <b>rs6920220a</b><br><b>rs58721818b</b> | 0.2<br>0.03  | 2.3 × 10 <sup>-13</sup><br>1.2 × 10 <sup>-8</sup> | 1.2<br>1.38  | 2.4 × 10 <sup>-4</sup>             | 0.91                                | 0.05<br>0.007  | 1<br>1       |
| TAGAP <sup>a</sup>            | <b>rs182429</b>                                  | 0.43 | 8.5 × 10 <sup>-16</sup> | 1.16         | <b>rs629326</b>                         | 0.41         | 1.1 × 10 <sup>-6</sup>                            | 0.9          | 0.02                               | 0.97                                | 0.44           | 0.69         |
| TAGAP                         | <b>Signal 2 rs1107943</b>                        | 0.07 | 2.8 × 10 <sup>-6</sup>  | 1.18         | <b>rs629326</b>                         | 0.41         | 1.1 × 10 <sup>-6</sup>                            | 0.9          | 0.3                                | 0.97                                | 0.06           | 1            |

|                    |                                        |      |                         |      |                                |              |                                              |            |                       |      |               |           |
|--------------------|----------------------------------------|------|-------------------------|------|--------------------------------|--------------|----------------------------------------------|------------|-----------------------|------|---------------|-----------|
| ELMO1 <sup>b</sup> | <b>[1kg_7_37384979]<br/>rs79758729</b> | 0.10 | 2.1 × 10 <sup>-8</sup>  | 1.18 | <b>rs75351767</b>              | 0.10         | 2.9x10 <sup>-7</sup>                         | 1.16       | 9.1x10 <sup>-7</sup>  | 1.15 | 0.98          | 0.99      |
| PVT1 <sup>b</sup>  | <b>rs10808568</b>                      | 0.26 | 2.2 × 10 <sup>-5</sup>  | 0.91 | <b>rs6651252</b>               | 0.13         | 2.0x10 <sup>-5</sup>                         | 0.88       | 0.05                  | 0.96 | 0.02          | 0.19      |
| PRKCQ <sup>a</sup> | <b>rs2387397</b>                       | 0.23 | 1.9 × 10 <sup>-8</sup>  | 0.88 | <b>rs947474a<br/>rs569158b</b> | 0.17<br>0.18 | 2.5x10 <sup>-5</sup><br>3.2x10 <sup>-4</sup> | 0.9<br>1.1 | 4.7x10 <sup>-4</sup>  | 0.92 | 0.75<br>0.008 | 1<br>0.36 |
| DDX6 <sup>a</sup>  | <b>rs10892258</b>                      | 0.24 | 1.7 × 10 <sup>-11</sup> | 0.86 | <b>rs4938573</b>               | 0.18         | 5.3x10 <sup>-7</sup>                         | 0.87       | 1.5x10 <sup>-4</sup>  | 0.91 | 0.62          | 0.88      |
| PTPN2 <sup>b</sup> | <b>rs11875687</b>                      | 0.15 | 1.9 × 10 <sup>-10</sup> | 1.17 | <b>rs62097857</b>              | 0.04         | 4.46x10 <sup>-6</sup>                        | 1.22       | 1x10 <sup>-4</sup>    | 1.1  | 0.008         | 1         |
| PTPN2              | <b>Signal 2 rs62097857</b>             | 0.04 | 5.2 × 10 <sup>-5</sup>  | 1.20 | <b>rs62097857</b>              | 0.04         | 4.46x10 <sup>-6</sup>                        | 1.22       | 4.5x10 <sup>-6</sup>  | 1.22 | 1             | 1         |
| IRAK1 <sup>a</sup> | <b>rs13397</b>                         | 0.13 | 2.7 × 10 <sup>-8</sup>  | 1.18 | <b>rs13397</b>                 | 0.12         | 2.7 × 10 <sup>-8</sup>                       | 1.18       | 2.5x10 <sup>-12</sup> | 1.23 | 1             | 1         |

**Supplementary Table 14:** Comparison of ImmunoChip dense mapping data in celiac disease and RA, for loci that are either confirmed at genome-wide significance in both diseases ( $p < 5 \times 10^{-8}$ )<sup>a</sup>, or are confirmed in celiac disease and highly suggestive ( $p < 2 \times 10^{-5}$ ) in RA<sup>b</sup>. \*All MAF in controls

| SNP        | Study P-value | $\lambda$ GC corrected (1.23) | Gender_covariate |
|------------|---------------|-------------------------------|------------------|
| rs34536443 | 2.30E-14      | 2.76E-14                      | 9.00E-15         |
| rs13397    | 1.20E-12      | 1.48E-10                      | 1.20E-12         |
| rs8026898  | 1.40E-10      | 1.69E-10                      | 4.30E-11         |
| rs8043085  | 1.40E-10      | 1.72E-10                      | 1.10E-10         |
| rs2240336  | 5.90E-09      | 7.27E-09                      | 2.17E-08         |
| rs8192284  | 1.30E-08      | 1.62E-08                      | 7.20E-08         |
| rs13330176 | 4.00E-08      | 4.95E-08                      | 4.05E-08         |

**Supplementary Table 15.** Results for novel loci on ImmunoChip after  $\lambda$ GC and gender correction

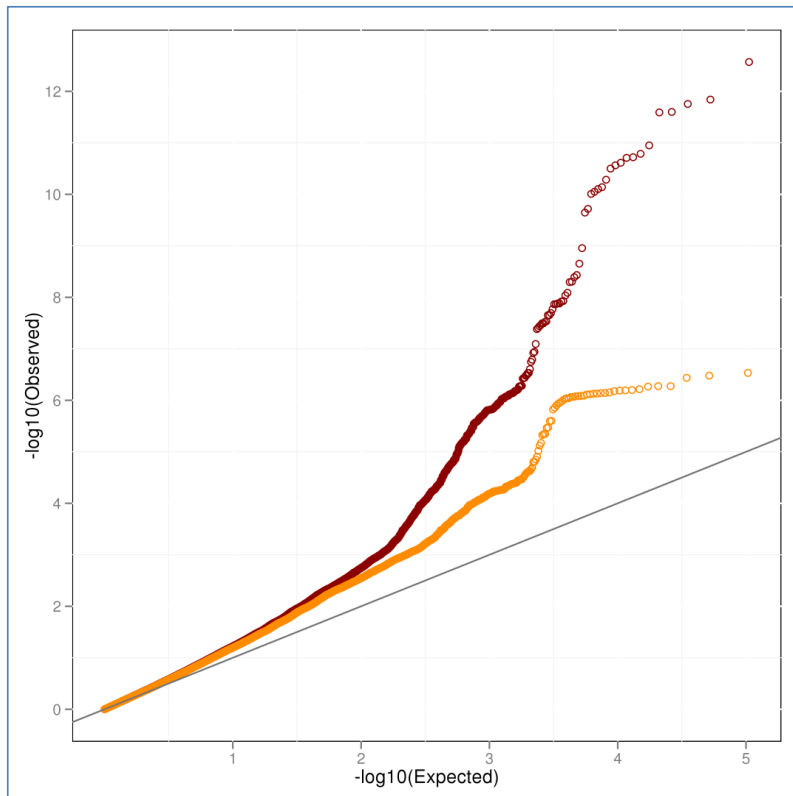

**Supplementary Figure 1:** QQ plot of observed versus expected results for the meta-analysis of the six sample collections. Red – excluding the MHC region and all other previously identified susceptibility loci, Orange – excluding the MHC region and all other previously identified and newly discovered loci.



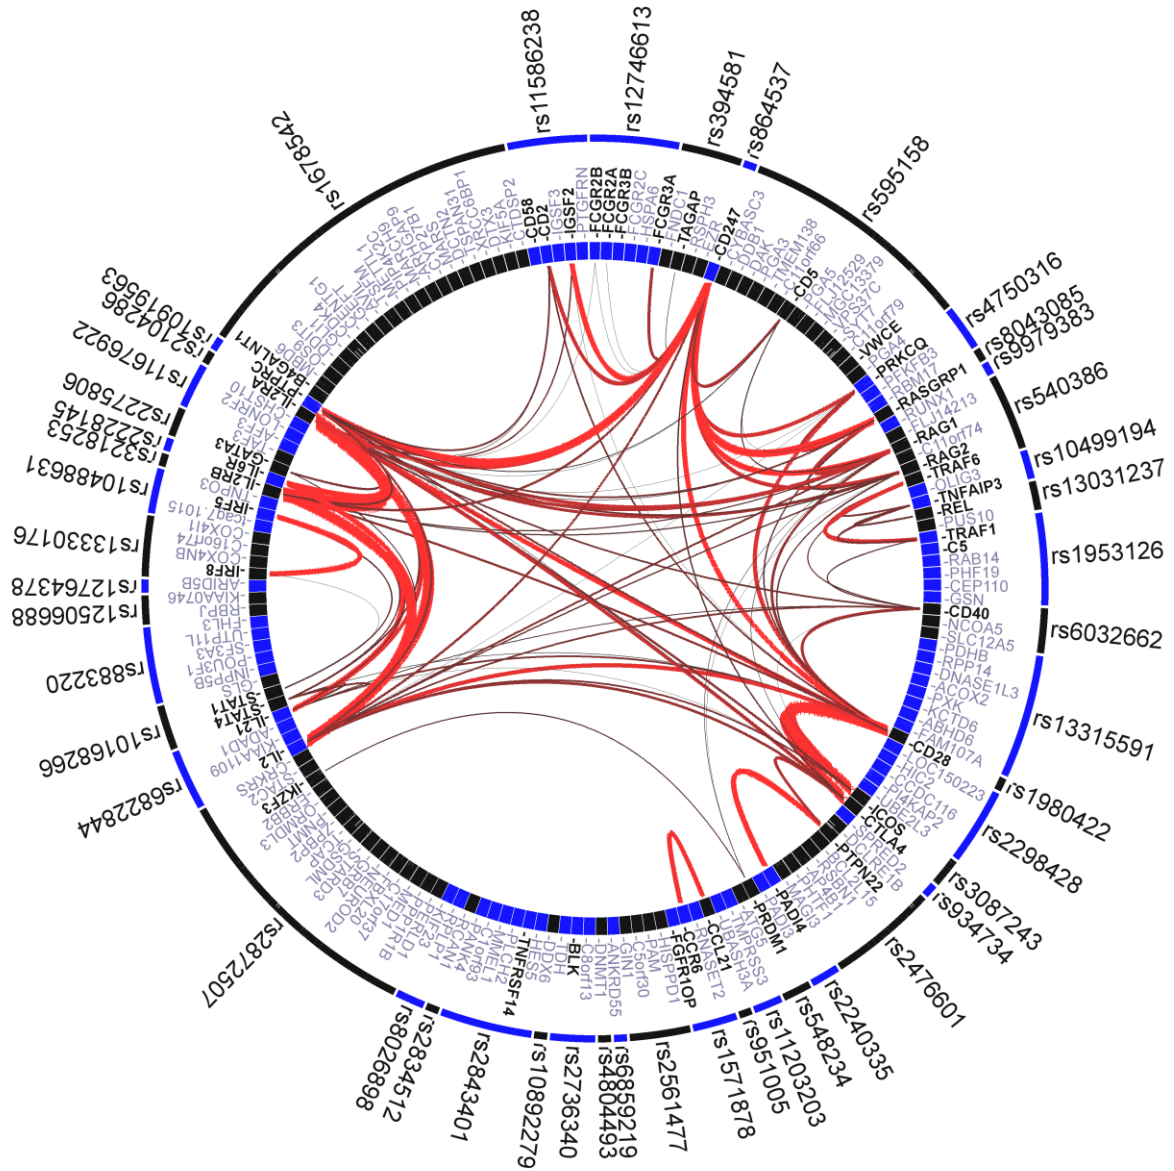

Supplementary Figure 2. GRAIL-VIZ plots for the confirmed rheumatoid arthritis genes. Associated genomic regions are along the outer circle, with the inner circle showing the individual genes. The thickness of lines connecting genes shows the strength of the GRAIL signal.

chr1:2384956–2796789 (acpa\_pos)

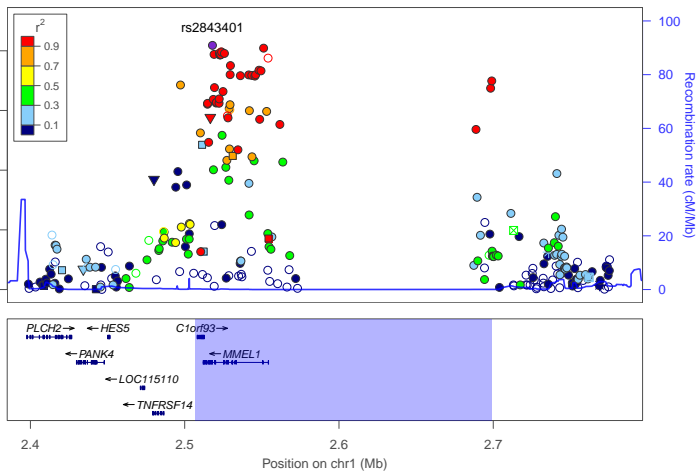

chr1:17467553–17574683 (acpa\_pos)

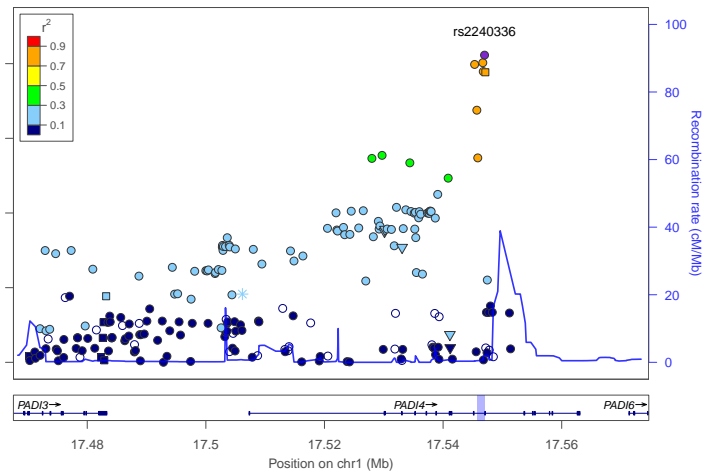

chr1:38230082–38437767 (acpa\_pos)

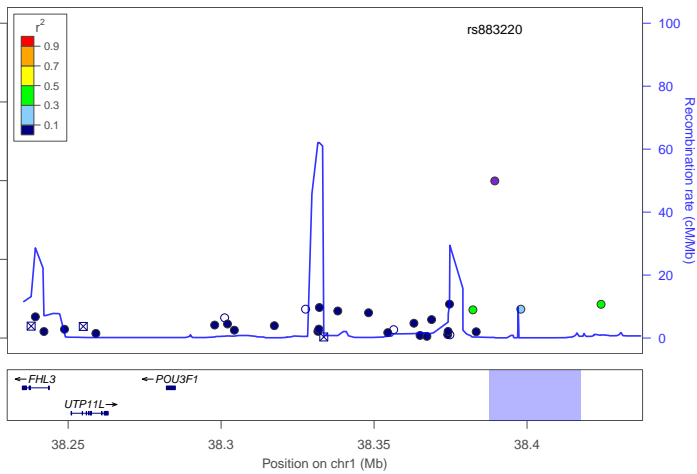

chr1:113575382–114540951 (acpa\_pos)

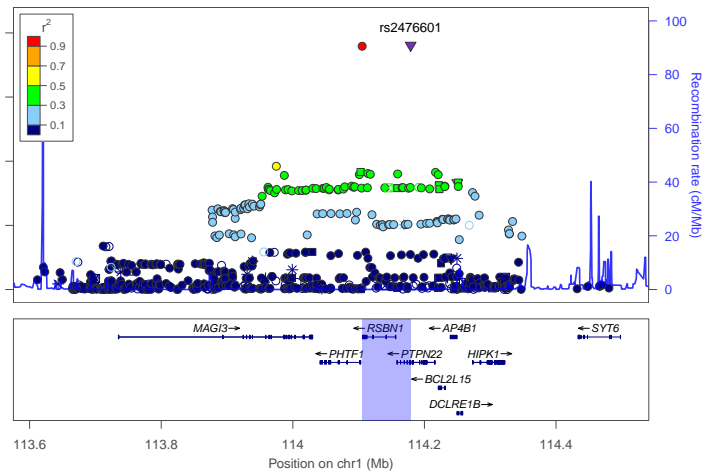

chr1:116807418–117455349 (acpa\_pos)

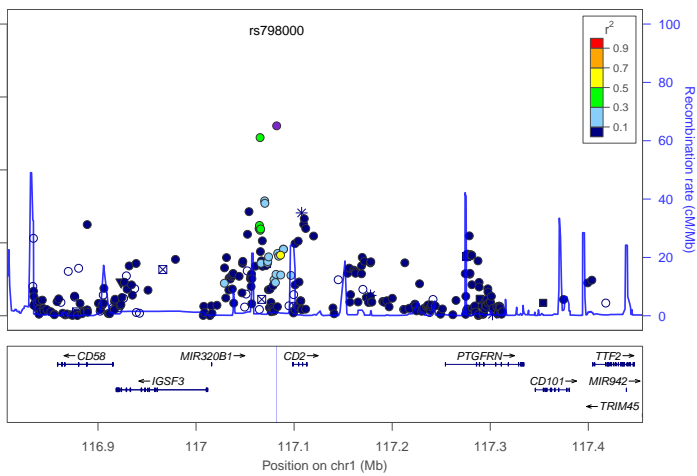

chr1:152619326–152756082 (all)

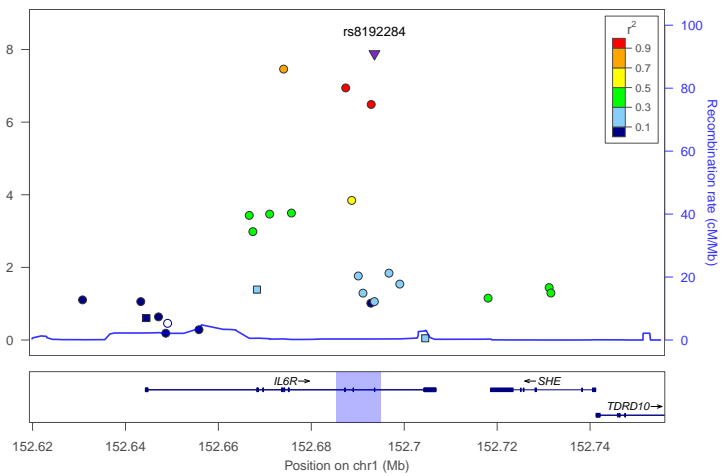

chr1:159513289–160026465 (all)

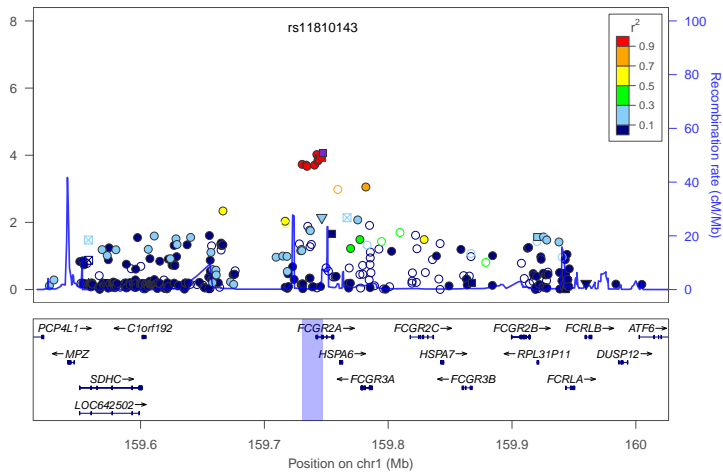

chr1:196638288–197276449 (pos)

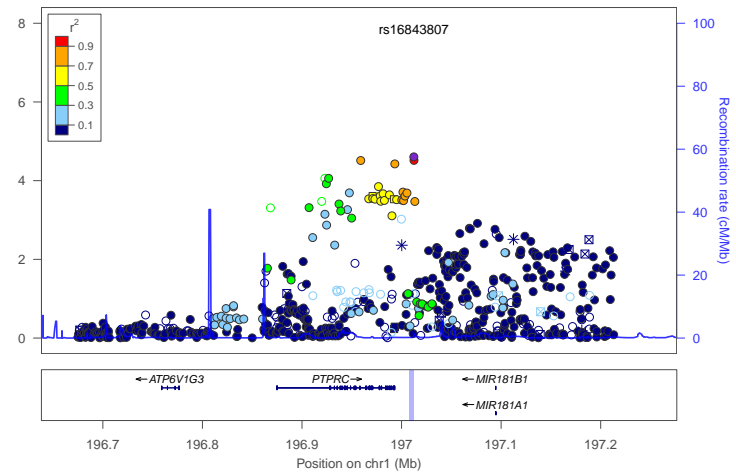

chr2:60302517–61918898 (acpa\_pos)

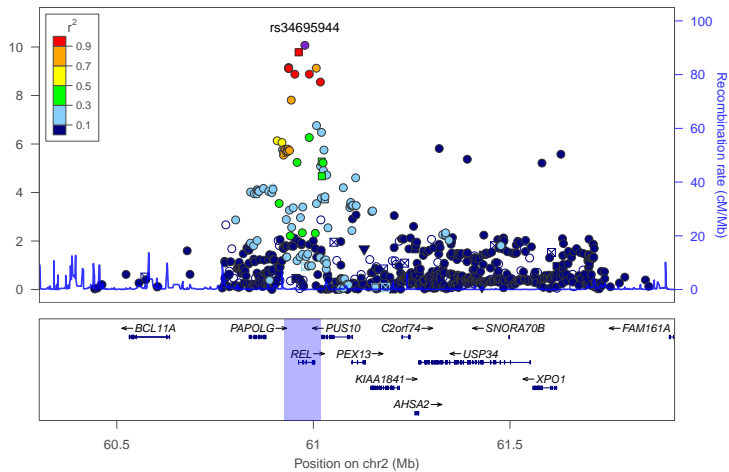

chr2:60302517–61918898 (acpa\_pos)

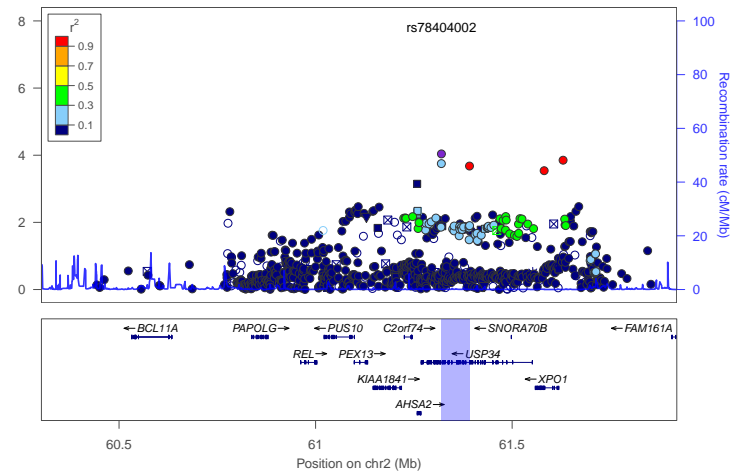

chr2:65193393–65626282 (acpa\_pos)

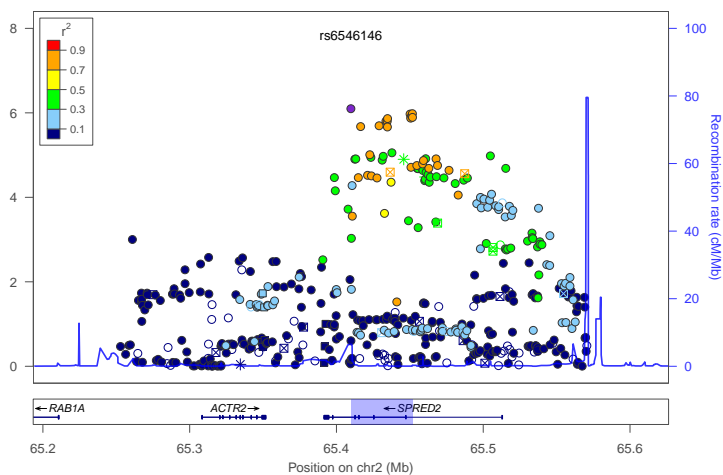

chr2:99408345–101152002 (all)

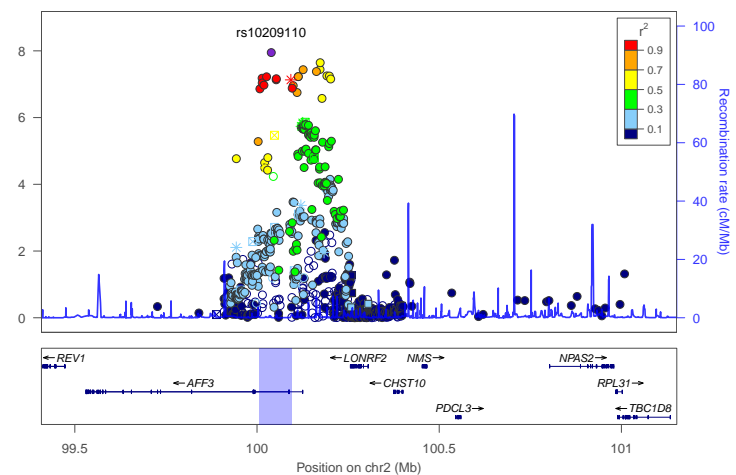

chr2:191545035–191735211 (all)

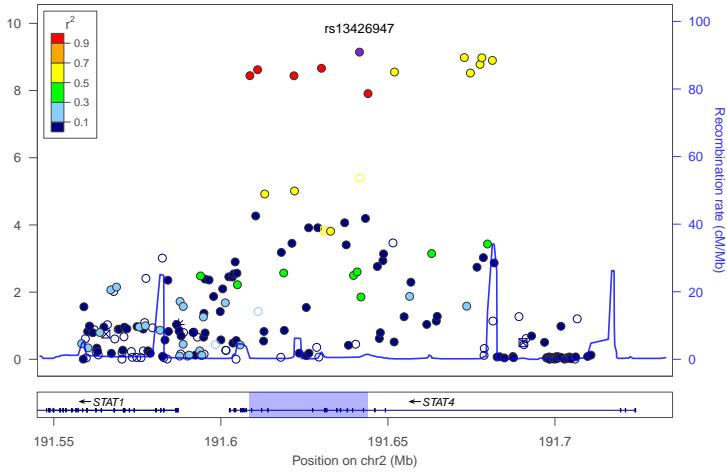

chr2:191545035–191735211 (all)

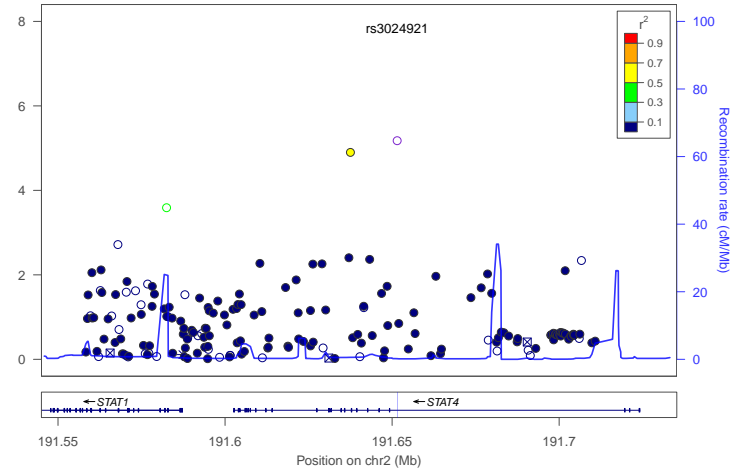

chr2:204396863–204573481 (acpa\_pos)

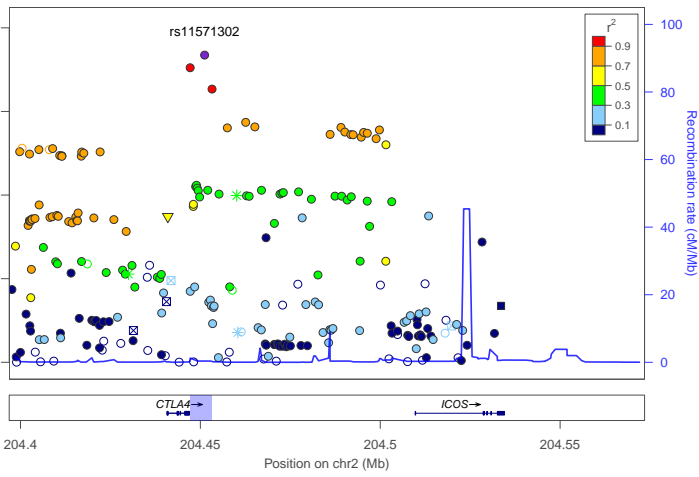

chr2:204135872–204396863 (acpa\_pos)

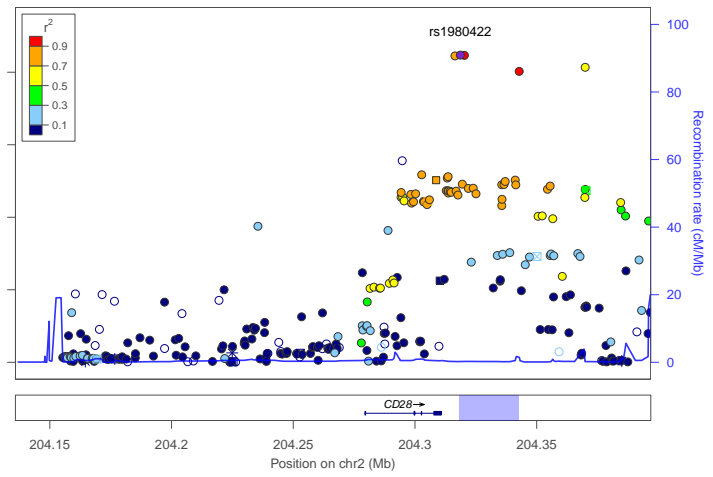

chr2:204135872–204396863 (acpa\_pos)

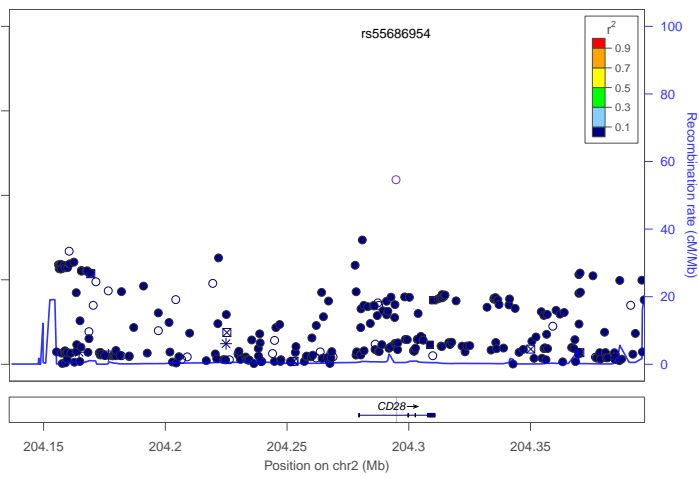

chr3:58121307–58547932 (all)

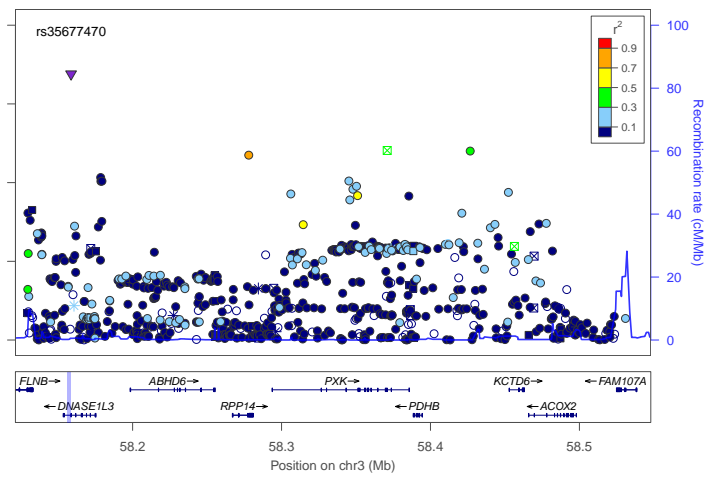

chr4:25616740–25800755 (acpa\_pos)

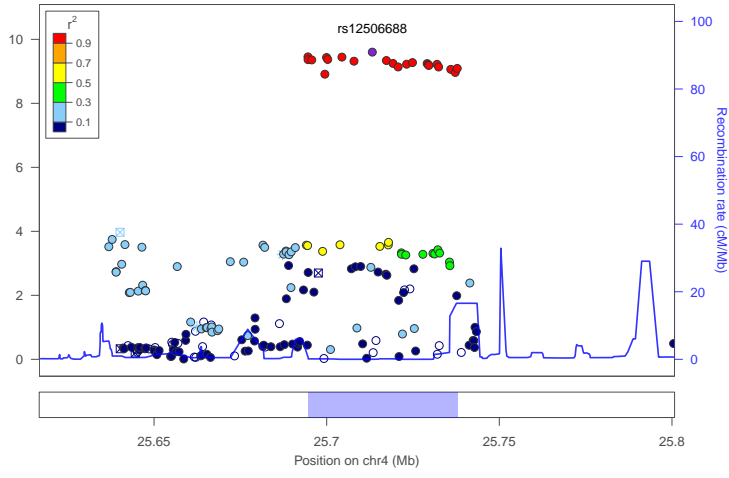

chr4:123057351–123910137 (all)

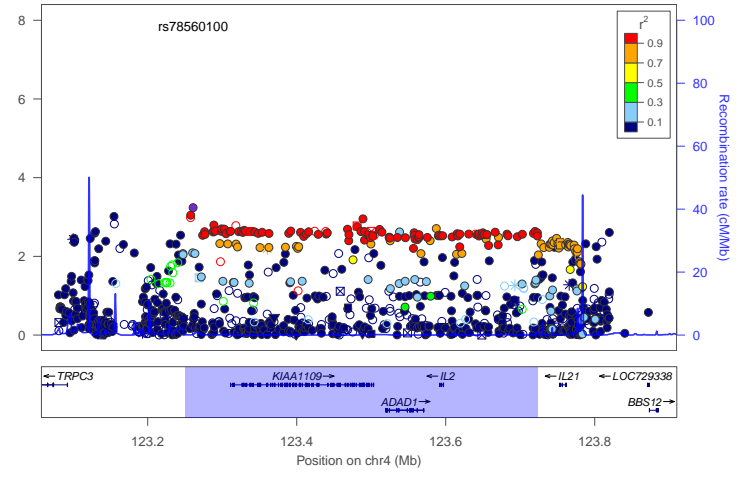

chr5:55439092–55506618 (all)

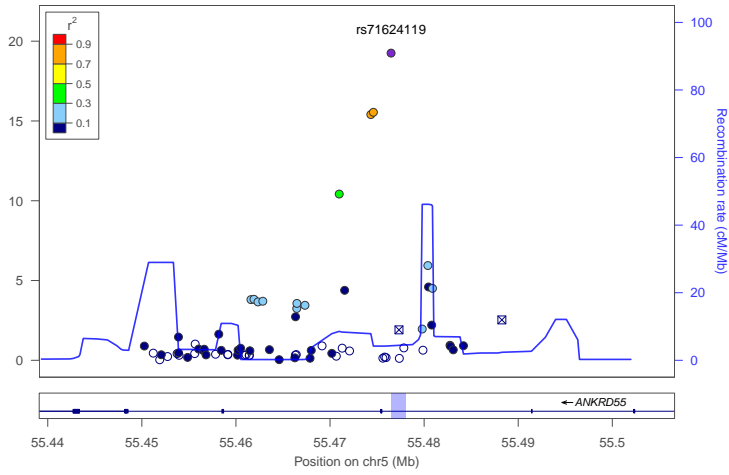

chr5:102117809–102772349 (all)

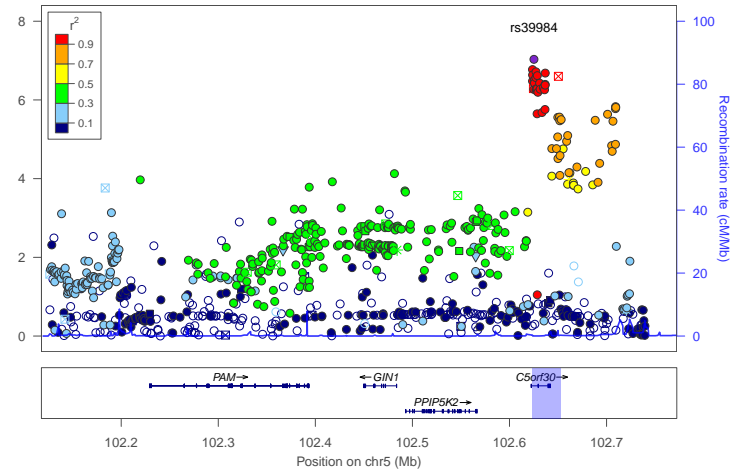

chr6:106494636–106755807 (acpa\_pos)

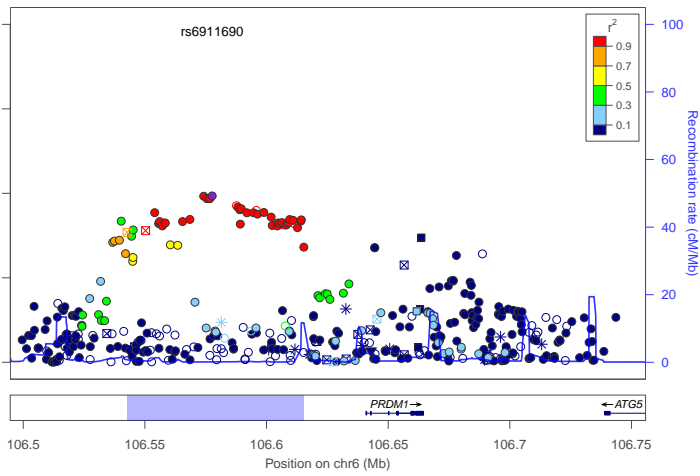

chr6:137906462–138355403 (acpa\_pos)

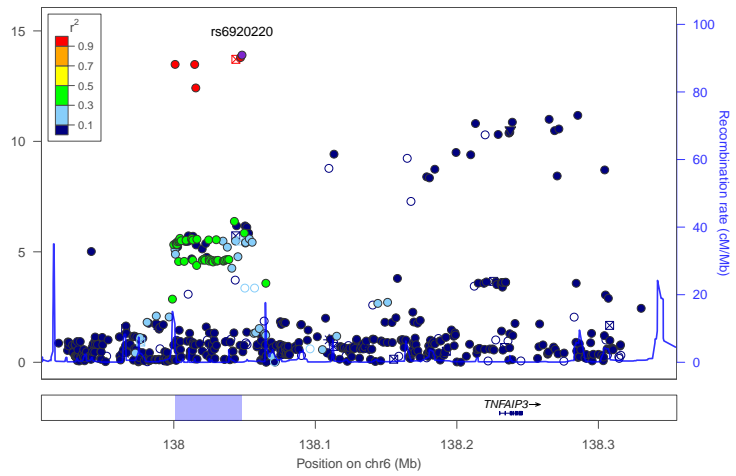

chr6:137906462–138355403 (acpa\_pos)

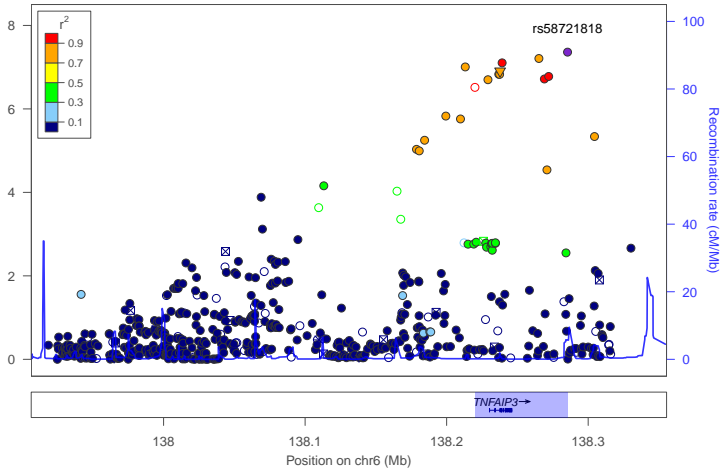

chr6:159231419–159472322 (acpa\_pos)

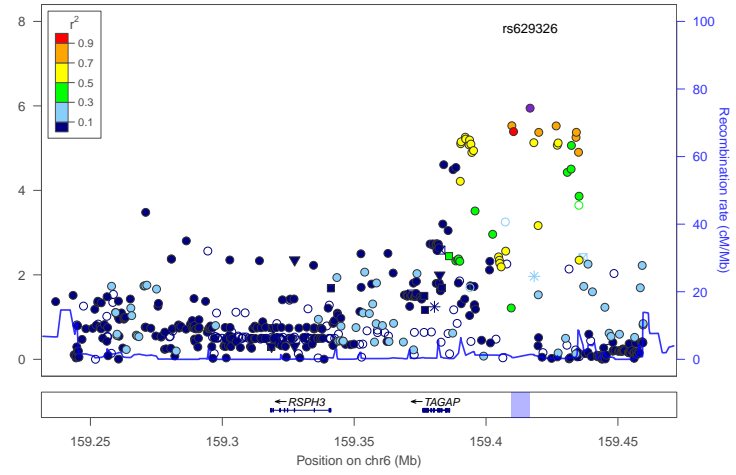

chr6:167238763–167510466 (acpa\_pos)

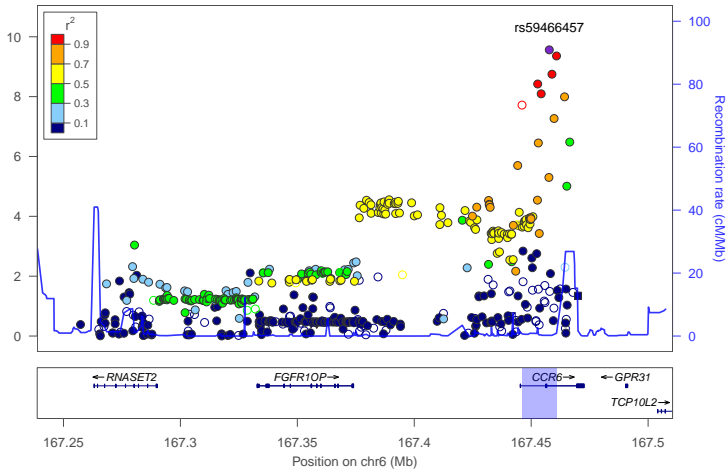

chr7:128321162–128593877 (acpa\_pos)

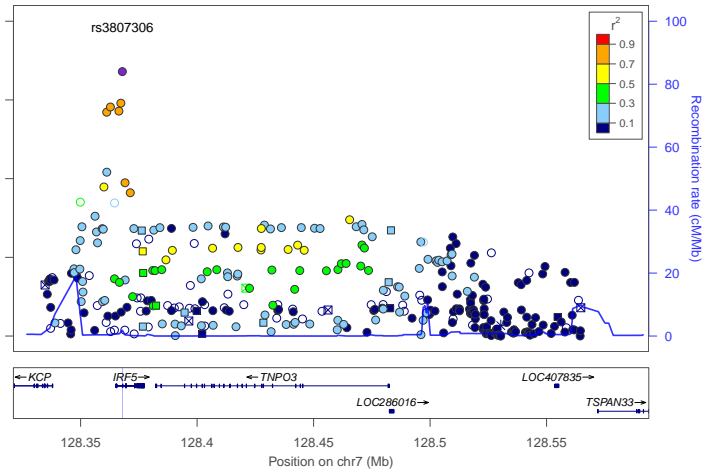

chr8:10631365–11581383 (all)

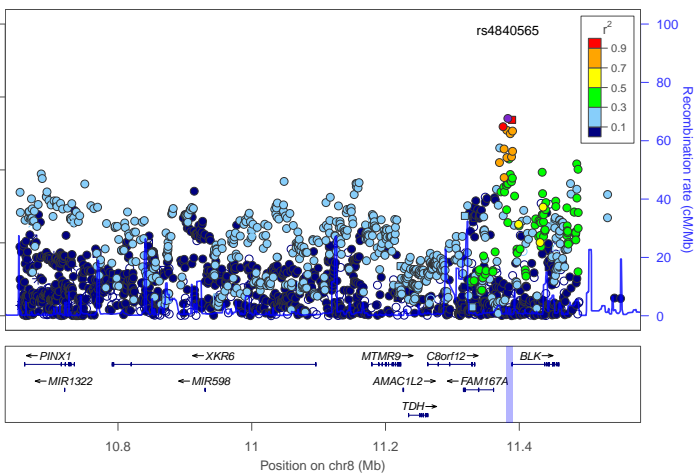

chr9:34625725–34987176 (acpa\_pos)

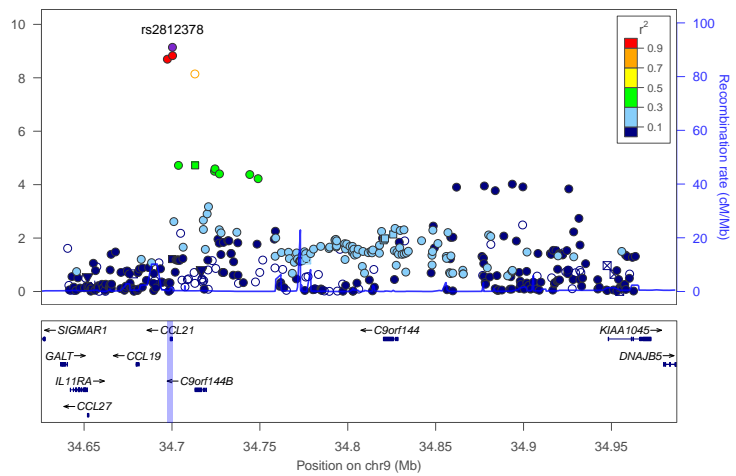

chr9:122378218–123232523 (acpa\_pos)

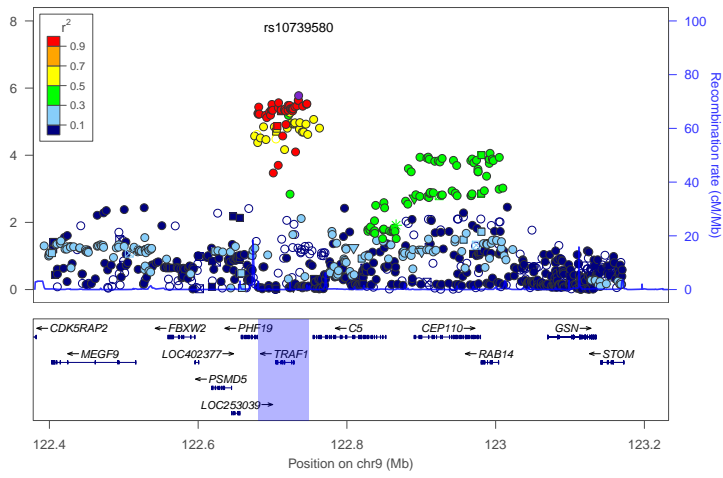

chr10:6058312–6332253 (all)

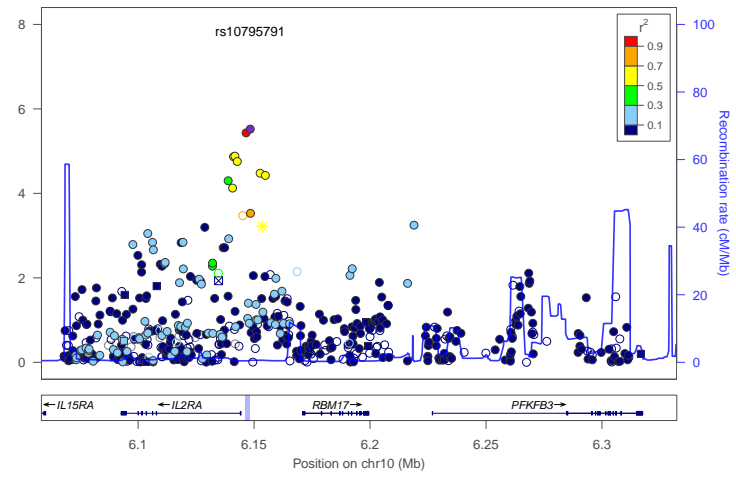

chr10:6417858–6690270 (all)

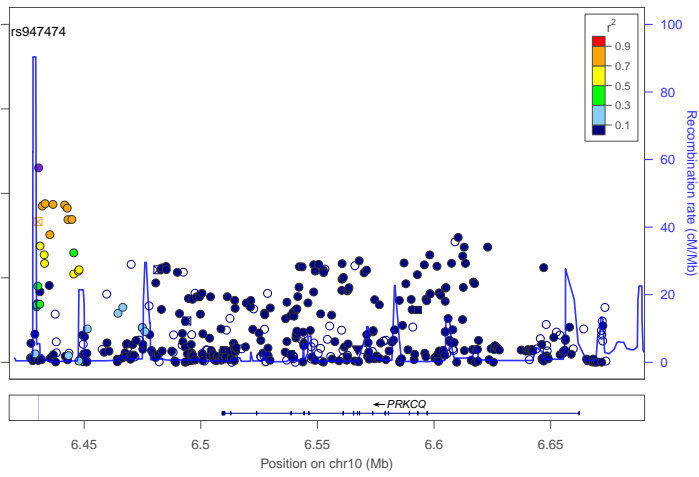

chr10:7574433–8354768 (acpa\_pos)

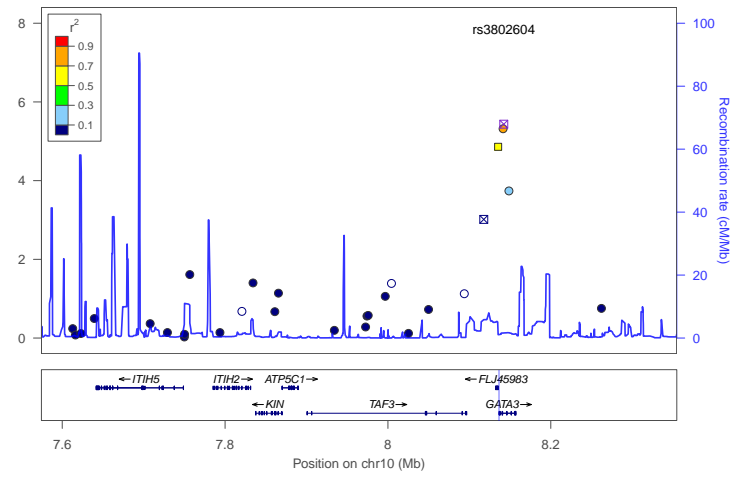

chr10:63308250–63540329 (acpa\_pos)

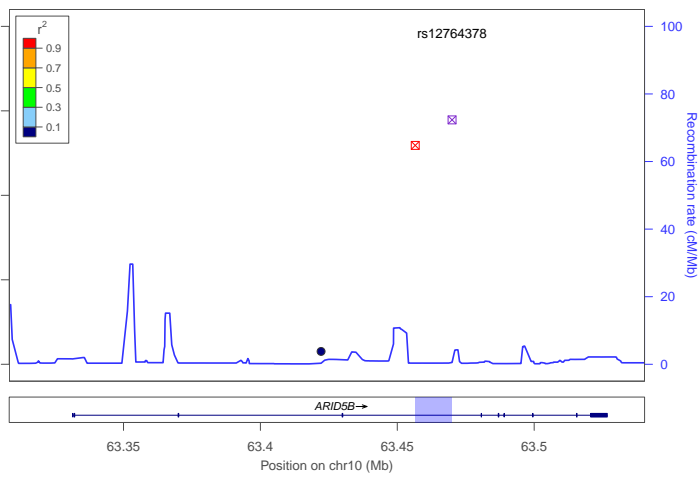

chr11:36357319–36594207 (acpa\_pos)

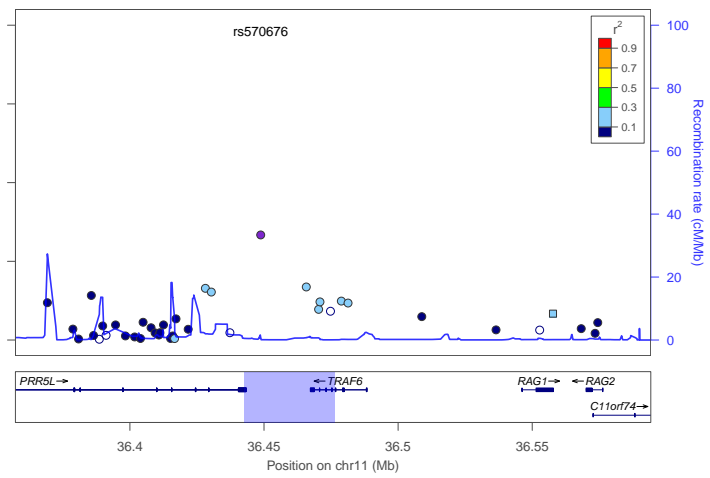

chr11:60449767-60683165 (all)

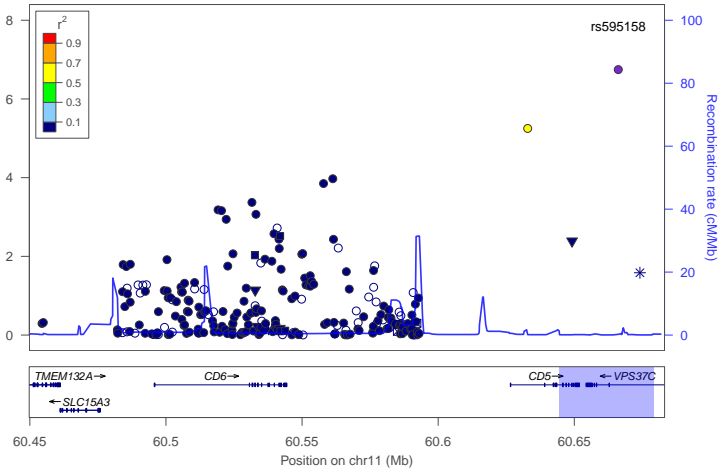

chr11:117821284-118302778 (acpa\_pos)

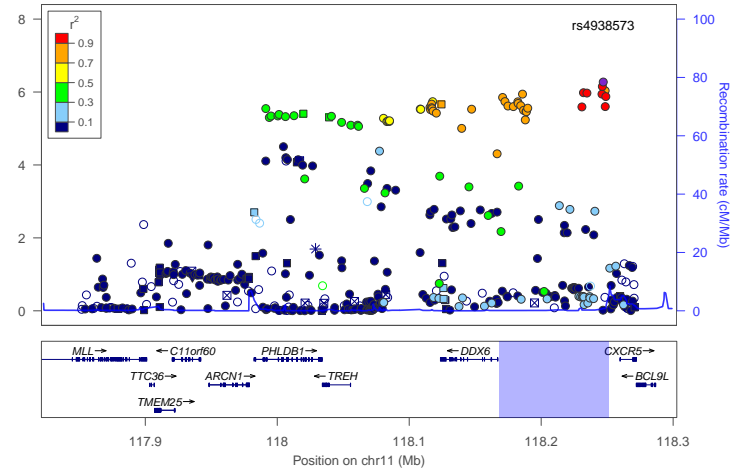

chr12:55894377-56822832 (acpa\_pos)

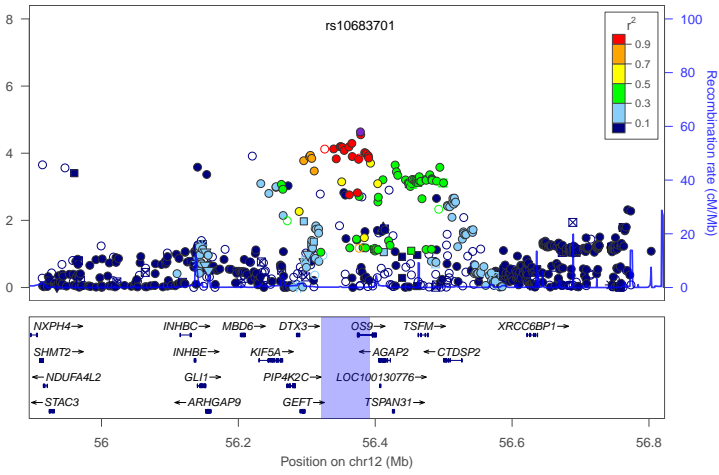

chr15:36547827-36806584 (acpa\_pos)

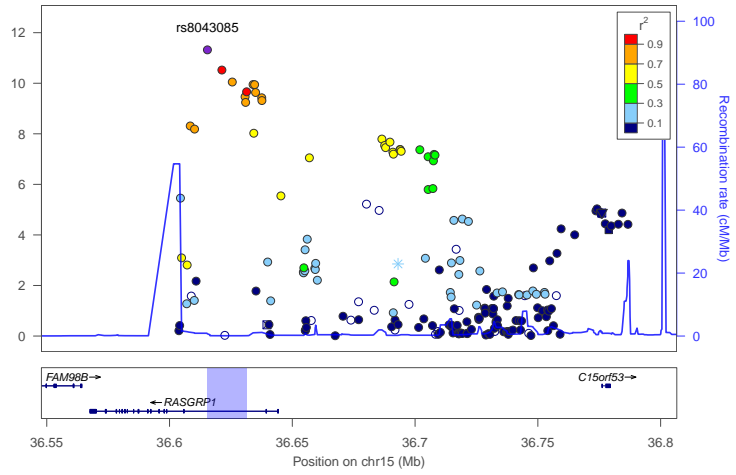

chr15:36547827-36806584 (acpa\_pos)

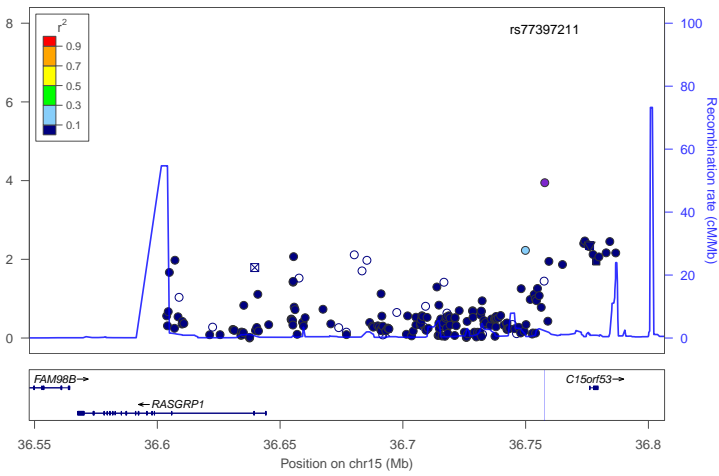

chr15:67503937-68590353 (acpa\_pos)

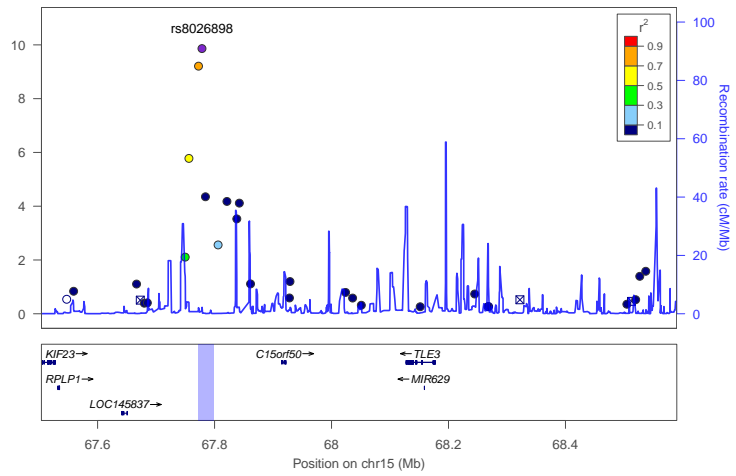



chr16:84474432–84595147 (acpa\_pos)

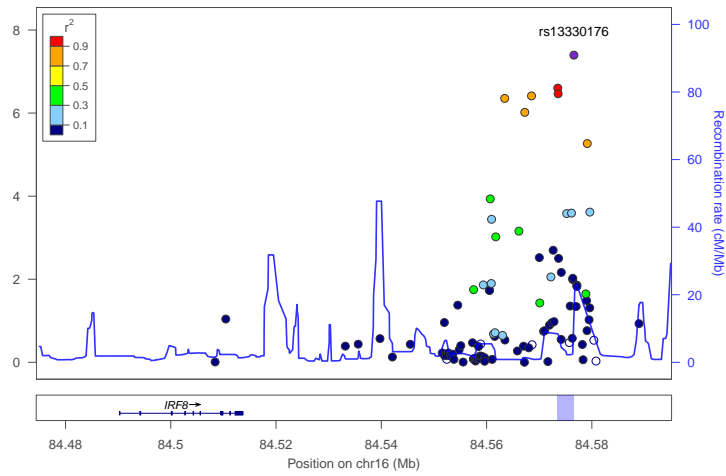

chr17:34629978–35548012 (all)

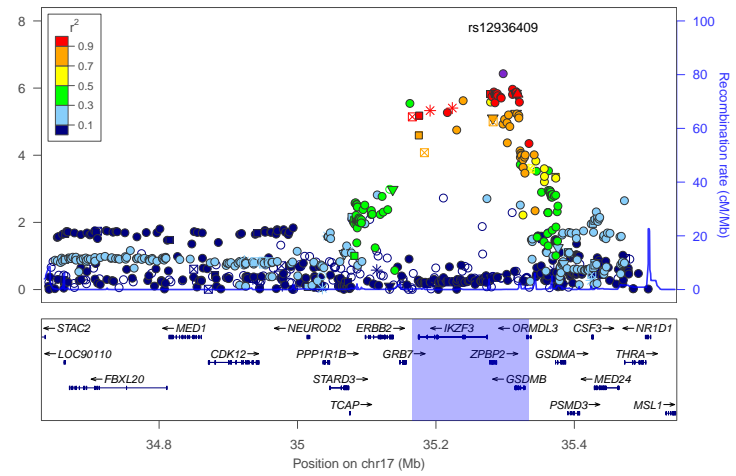

chr19:10152535–10649003 (acpa\_pos)

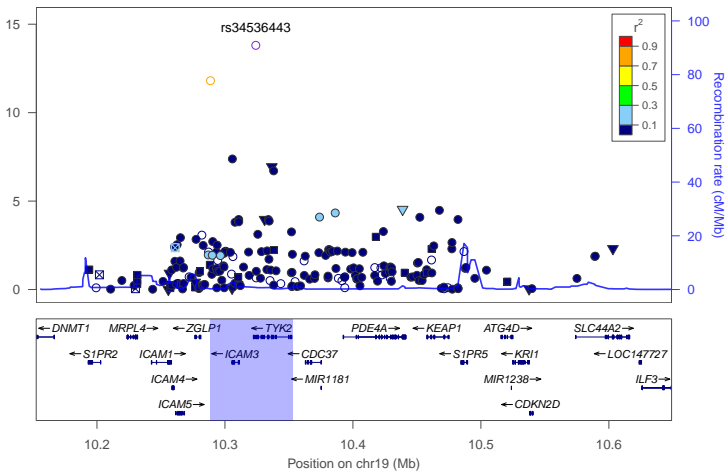

chr19:10152535–10649003 (acpa\_pos)

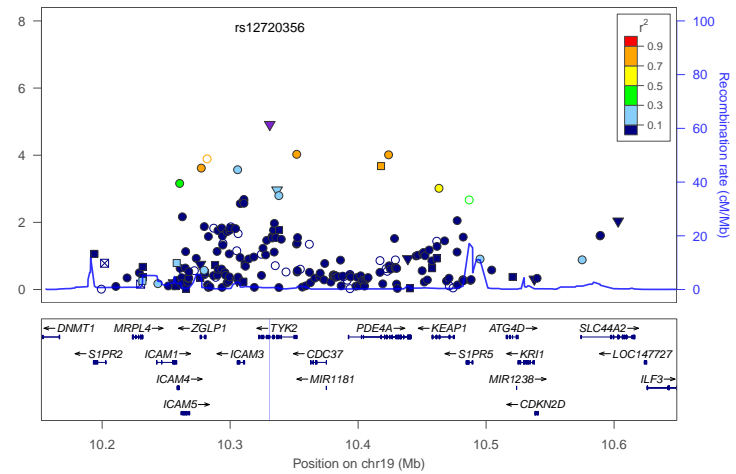

chr20:44023805–44252386 (acpa\_pos)

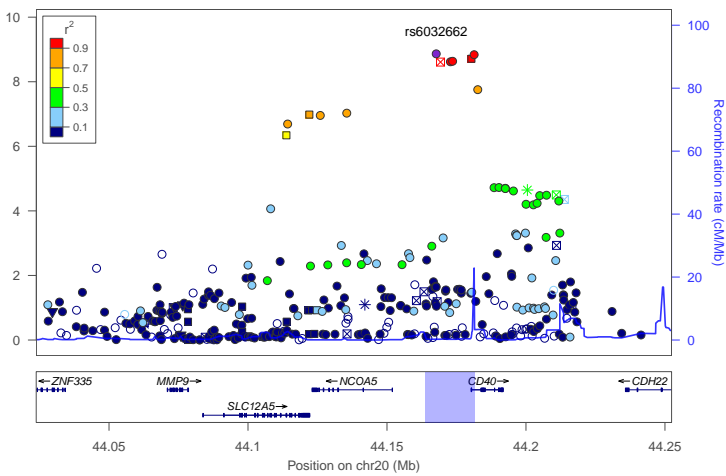

chr21:34799636–34882362 (acpa\_pos)

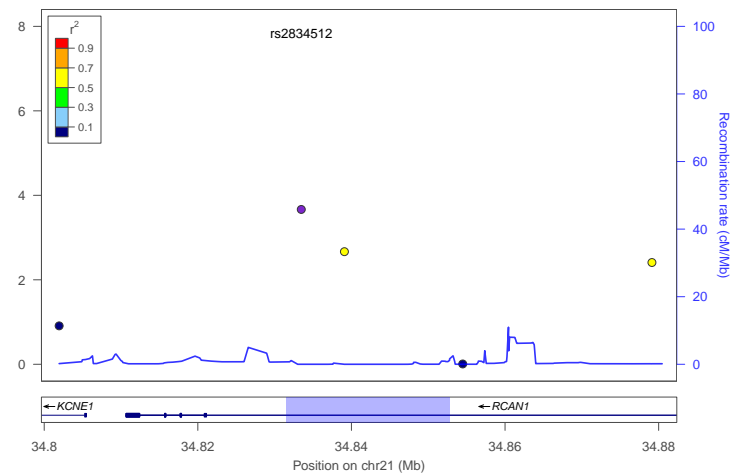

chr21:35032436-35761558 (all)

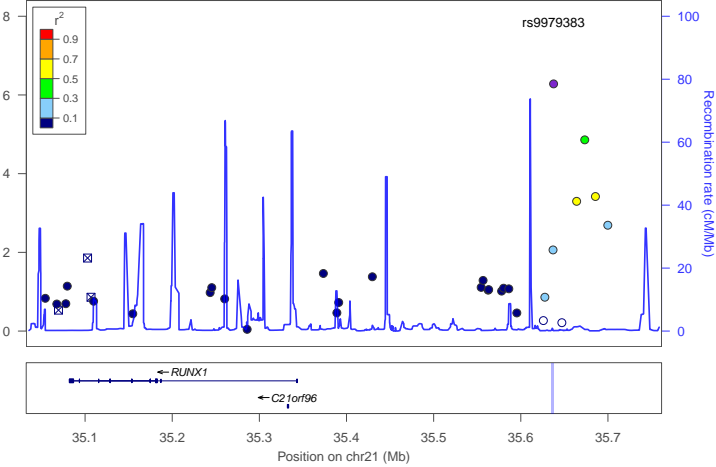

**Supplementary Figure 3:** Regional association plots of immuno-chip data for all previously known and novel regions. The linkage disequilibrium based localisation ( $r^2 \geq 0.9$  with index SNP) of the association signal is indicated in the gene track by a light blue box. SNP annotation provided by LocusZoom databases (triangle - framestop/splice site, inverted triangle - nonsynonymous, box - synonymous/UTR, star - transcription factor binding site, crossed-box - multi-species conserved site).

**P-value**

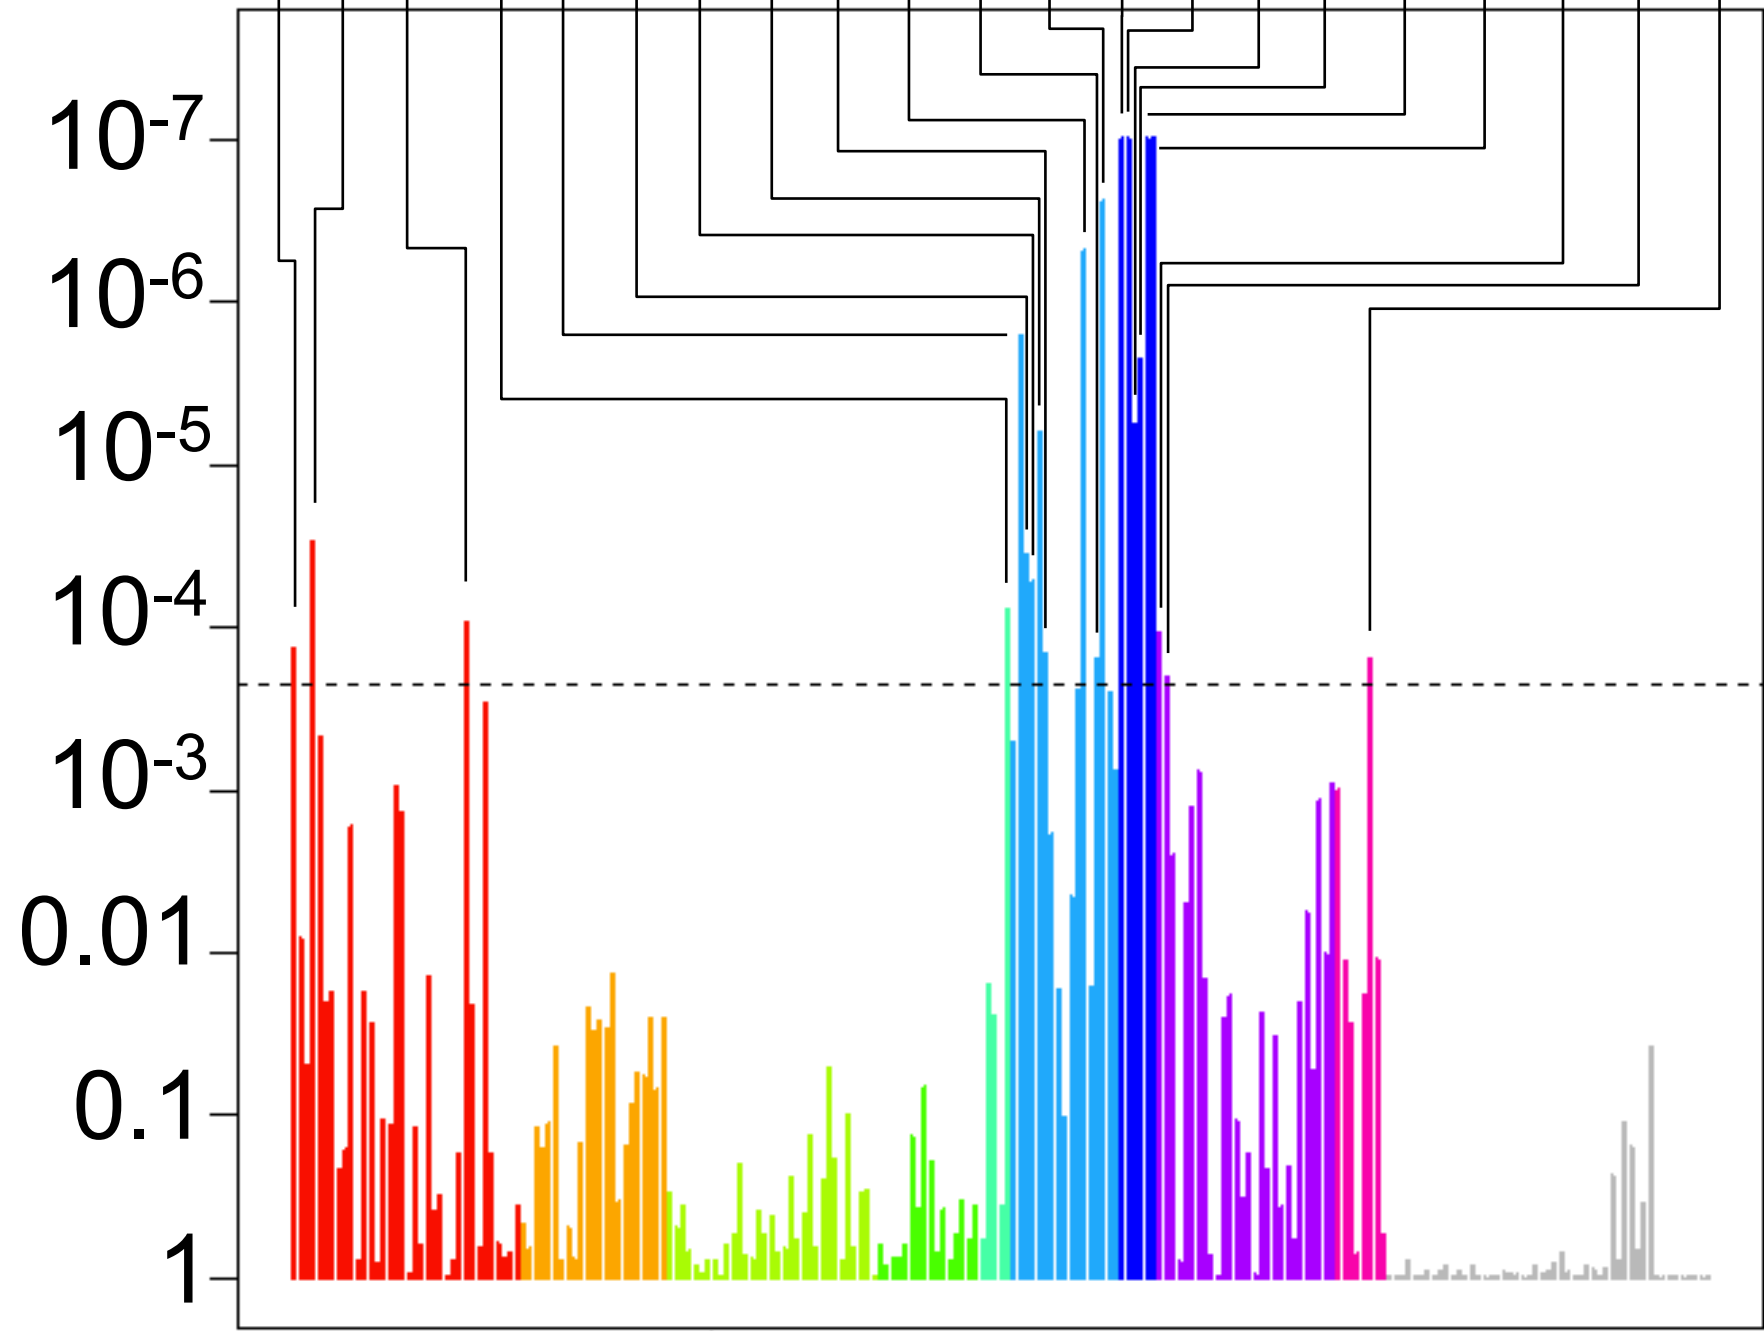

Tgd.Th  
Tgd.vg2-24ahi.Th  
Tgd.vg1+vd6-.Th  
T.DP.Th  
T.4SP69+.Th  
T.4SP24int.Th  
T.4SP24-.Th  
T.4int8+.Th  
T.4Nve.Sp  
T.4.Pa.BDC  
T.4FP3+25+.Sp  
T.4.Sp.B16  
**T.4Mem.Sp**  
**T.4Mem44h62l.Sp**  
T.4Mem.Tbet-.Sp  
T.4Mem.Tbet+.Sp  
**T.4Mem.LN**  
**T.4Mem44h62l.LN**  
T.8SP69+.Th  
T.8SP24int.Th  
NKT.4+.LV

**Cell Types**

- |                    |                 |                         |
|--------------------|-----------------|-------------------------|
| gdT-cells          | Dendritic cells | Double-positive T-cells |
| B-cells            | NK cells        | CD4 T-cells             |
| CD4 Memory T-cells | CD8 T-cells     | NKT cells               |
| Other              |                 |                         |

**Supplementary Figure 4:** We evaluated the cell-specific expression of genes contained in 47 RA loci in 223 murine immune-cell types. To do this we compared specific expression of genes within RA loci to genes within randomly selected loci matched for gene number. We show the Bonferroni-corrected p-value ( $0.05/223 = 2.24 \times 10^{-4}$ ) with a dotted line. We labeled all cell types that are significant after adjusting for multiple hypothesis at the top of the plot. The four most significant cell types ( $p < 10^{-7}$ , CD4 memory T-cells in subcutaneous lymph node and spleen, and CD44<sup>high</sup>CD62<sup>low</sup> CD4 memory T-cells in subcutaneous lymph node and spleen) are labeled in red.

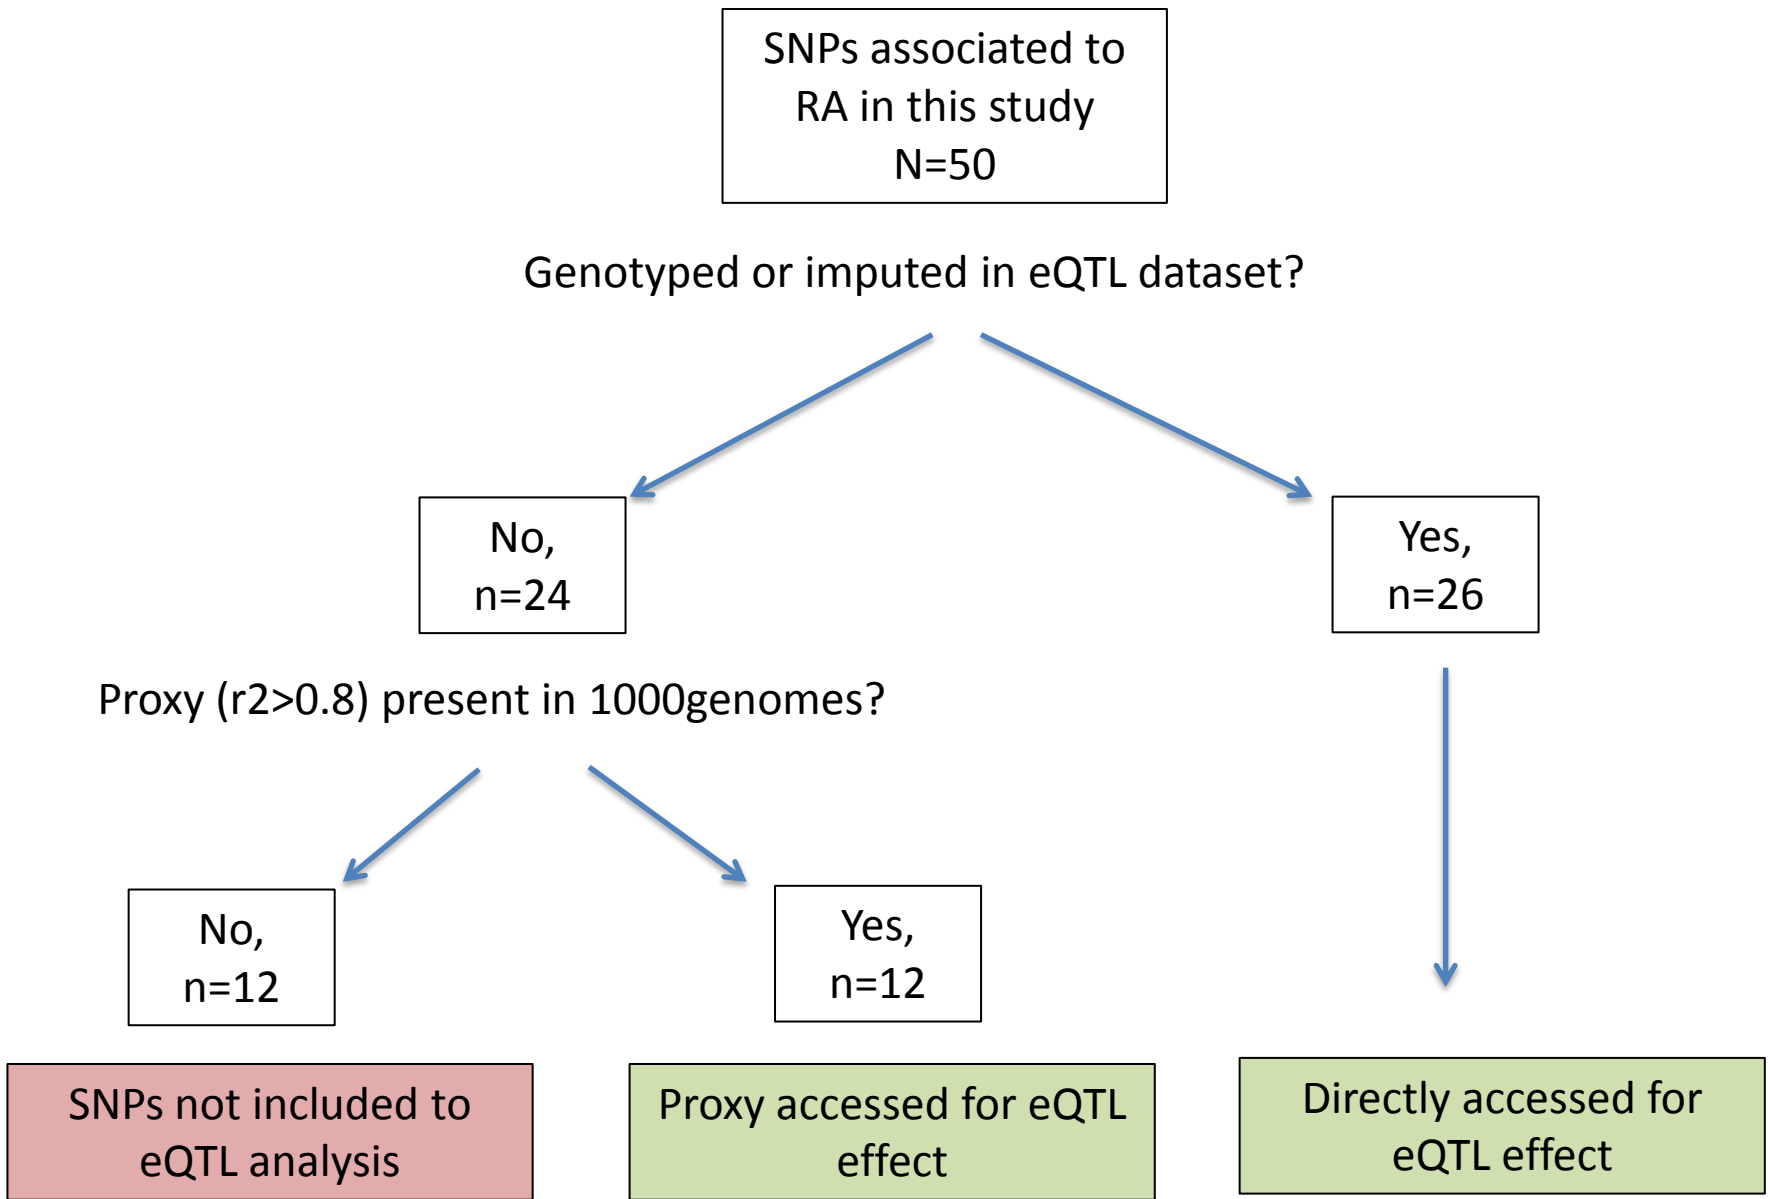

Supplementary Figure 5. Scheme of SNP selection for eQTL analysis

## Supplementary Note

### Sample collections

**United Kingdom (UK):** The UK Manchester cohort of patients with rheumatoid arthritis (n =4752) were recruited from across the UK. All cases were European ancestry of Northern European descent and all fulfilled the 1987 American College of Rheumatology classification criteria modified for genetic studies. All participants were recruited after providing informed consent and the study was approved by the North West Research Ethics Committee (MREC 99/8/84). Serum RF and ACPA antibody titre were measured using commercially available kits [RF-PAIA Immunoturbidimetric Assay for rheumatoid factor, Diastat™ ACPA Kit (Axis-Shield Diagnostics Limited, UK)]. Patients with titres  $\geq 40$  units/ml and  $\geq 5$  units/ml were defined as positive for RF and ACPA antibodies, respectively.

**United States (US):** Cases from the U.S. have been studied and reported on previously and include three major datasets, totalling 2740 rheumatoid arthritis cases submitted for genotyping on the ImmunoChip. The NARAC cases (n=1312, 69% ACPA+) are largely derived from families with rheumatoid arthritis affected sibling pairs supplemented with singleton subjects whose siblings did not meet criteria for study entry, US singleton rheumatoid arthritis subjects and subjects from trio families<sup>18, 19</sup>. A second selected group of all ACPA+ rheumatoid arthritis subjects (n=660) included patients recruited by Dr. Frederick Wolfe in his practice as well as rheumatoid arthritis subjects enrolled in a published inception cohort as well as subjects followed in the National Database for Rheumatic Diseases, directed by Dr. Wolfe<sup>20, 21</sup>. A third cohort of subjects (N=768, 44% ACPA+) were derived from an inception cohort study, SONORA, as described previously<sup>22</sup>.

**Sweden EIRA (SE-E):** Swedish cohort consisting of 2955 incidence rheumatoid arthritis cases and 2086 matched controls from Swedish epidemiological and genetic study of rheumatoid arthritis (EIRA) study, which is described elsewhere<sup>23</sup>. All rheumatoid arthritis patients met the American College for Rheumatology 1987 (ACR-87) revised criteria for rheumatoid arthritis and blood samples were collected at 19 rheumatology units across Sweden (mainly middle and south of country). Controls were matched by date of birth, sex and residence area, were invited by mail and were asked to leave a blood sample in local ward. Ethics permit was received and informed consent was registered according to the current Swedish law.

**Sweden Umea (SE-U):** The Swedish Umea cohort is an inception cohort of patients fulfilling the American College of Rheumatology (ACR) 1987 criteria for classical rheumatoid arthritis (Arnett et al 1988) from the four most northern counties of Sweden. The controls are randomly selected, matched for age and sex, donors to the population based Medical Biobank of Northern Sweden. The patients and controls have the same ethnic background. Detection of Anti-Cyclic citrullinated peptide antibodies was analysed using enzyme-linked immunoassays (Euro-Diagnostica, Malmö, Sweden) according to manufacturer's instructions. Cut-off for positivity was 25 AU/ml. The regional

Ethics Committee at the University Hospital of Umeå approved this study and all participants gave their written informed consent.

**The Netherlands (NL):** Patients visiting the out-patient clinic with arthritis in at least one joints and symptom duration of less than two year were included in the Leiden-Early Arthritis Clinic (Leiden-EAC). Patients that were diagnosed with rheumatoid arthritis according to the 1987 ACR criteria within one year after inclusion in the Leiden-EAC were included in the current study (n=648).The study was approved by the local ethical committee and all patients gave their informed consent. Controls were obtained from the blood donors and have been described<sup>3</sup>.

**Spain (ES):** The Spanish cohort of rheumatoid arthritis patients (n=914) were recruited across Spain fulfilling the American College of Rheumatology 1987 classification criteria. The controls (n=447) were obtained from the Spanish DNA Bank, matched by age and sex. Both patients and controls were white of Southern European descent. All participants were recruited after providing informed consent.

#### **Members of the Biologics in Rheumatoid Arthritis Genetics and Genomics Study Syndicate (BRAGGSS)**

**Steering Committee members: Prof Anne Barton, Professor John Isaacs, Prof Ann Morgan, Prof Gerry**

**Wilson, Dr Kimme Hyrich.**

Basingstoke & North Hampshire NHS Foundation Trust (Dr R K Moitra, Dr P J Prouse, Dr D J Shawe)

Cambridge University Hospitals NHS Foundation Trust (Dr. A J Crisp, Prof. J S H Gaston, Dr. F C Hall, Dr. B L Hazleman, Dr. J R Jenner, Dr M S Lillicrap, Dr. A Ostor, Dr B Silverman, Dr. C Speed)

Central Manchester University Hospitals NHS Foundation Trust (Dr I N Bruce, Dr K Hyrich, Dr P Ho, Dr R Gorodkin)

County Durham and Darlington NHS Foundation Trust (Dr. D. Armstrong, Dr. A J Chuck, Dr. S Hailwood, Dr N Kumar)

Derby Hospitals NHS Foundation Trust (Dr. L J Badcock, Dr. C M Deighton, Dr. S C O'Reilly, Dr N Raj, Dr. M R Regan, Dr.G D Summers, Dr. R A Williams)

Doncaster And Bassetlaw Hospitals NHS Foundation Trust (Dr. J R Lambert, Dr. R Stevens, Dr C Wilkinson)

Gateshead Health NHS Foundation Trust (Dr. J Hamilton, Dr. C R Heycock, Dr. C A Kelly, Dr V Saravanan)



Hereford Hospitals NHS Trust (Dr. D H Rees, Dr. R B Williams)

Leeds Teaching Hospitals NHS Trust (Dr. S. Bingham, Prof. P Emery, Dr. A. Morgan, Prof H A Bird, Prof P G Conaghan, Dr C T Pease, Dr R J Wakefield)

Mid-Staffordshire NHS Foundation Trust (Dr. S V Chalam, Dr. D Mulherin, Dr. T Price, Dr. T Sheeran, Dr S Venkatachalam)

Norfolk&Norwich University Hospital NHS Foundation Trust (Dr. K Gaffney, Prof. A J Macgregor, Dr. T Marshall, Dr. P Merry, Prof. D G I Scott)

Northumbria Healthcare NHS Foundation Trust (Dr F N Birrell, Dr P R Crook)

Pennine Acute Hospitals NHS Trust (Dr. B Harrison, Dr. M Pattrick, Dr. H N Snowden, Dr A P Bowden, Dr E E Smith, Dr P Klimiuk, Dr D J Speden)

Peterborough and Stamford Hospitals NHS Foundation Trust (Dr. N J Sheehan, Dr. N E Williams, Dr S Dahiya)

Portsmouth Hospitals NHS Trust (Dr. R G Hull, Dr. J M Ledingham, Dr. F Mccrae, Dr. M R Shaban, Dr. A L Thomas, Dr S A Young Min)

Queen Mary's Sidcup NHS Trust (Dr A N Bamji, Dr N T Cheung)

Sandwell and West Birmingham Hospitals NHS Trust (Prof C D Buckley, Dr D C Carruthers, Dr R Elamanchi, Dr P C Gordon, Dr. K A Grindulis, Dr. F Khattak, Dr K Raza, Dr D.Situnayake)

Sheffield Teaching Hospitals NHS Foundation Trust (Drs S Till, M Akil, R Tattersall, R Kilding, L Dunley, J Boulton, T Tait, Prof A G Wilson, Prof D E Bax).

South Tees Hospitals NHS Foundation Trust (Dr. F Clarke, Dr. J N Fordham, Dr. M J Plant, Dr Tuck, Dr S K Pathare)

Southampton University Hospitals NHS Trust (Dr C J Edwards, Dr N K Arden, Dr R D Armstrong, Dr A Calogeras, Prof C Cooper, Dr B K S Davidson, Dr E M Dennison)

St Helens and Knowsley Hospitals NHS Trust (Dr. V E Abernethy, Dr A R Clewes, Dr. J K Dawson, Dr. M Lynch)

The Dudley Group of Hospitals NHS Foundation Trust (Prof G Kitas, Dr J P Delamere, Dr N Erb, Dr R Klocke, Dr A J Whallett)

The Newcastle upon Tyne Hospitals NHS Foundation Trust (Mr P Crook, Dr. H E Foster, Dr. B Griffiths, Dr. I D Griffiths, Dr. M L Grove, Prof. J D Isaacs, DR L Kay, Dr W F Ng, Dr A Myers, Dr. P N Platt, Dr. D J Walker)

University Hospital Birmingham NHS Foundation Trust (Dr. Bowman, Dr. P Jobanputra, Dr. R W Jubb, Dr. E C Rankin)

University Hospital of North Staffordshire NHS Trust (Dr. P T Dawes, Dr C M Dowson, Dr. A Hassell, Prof. E M Hay, Dr. S Kamath, Dr. J Packham, Dr R S Sandhu, Dr. M F Shadforth)

University Hospitals of Morecambe Bay NHS Trust (Dr. M Bukhari, Dr. W N Dodds, Dr. J P Halsey, Dr W S Mitchell)

West Suffolk Hospitals NHS Trust (Dr D T O'Reilly)

Whipps Cross University Hospital NHS Trust (Dr. S P Donnelly, Dr. D Doyle, Dr. A Hakim, Dr. J G Lanham, Dr H I S Tahir, Dr J Rathi)

Worcestershire Acute Hospitals NHS Trust (Dr A Rai, Dr I F Rowe, Dr A Prabu, Dr C A M Buckley)

## **Membership of the Wellcome Trust Case Control Consortium (WTCCC)**

### Management Committee

Paul R. Burton<sup>1</sup>, David G. Clayton<sup>2</sup>, Lon R. Cardon<sup>3</sup>, Nick Craddock<sup>4</sup>, Panos Deloukas<sup>5</sup>, Audrey Duncanson<sup>6</sup>, Dominic P. Kwiatkowski<sup>3,5</sup>, Mark I. McCarthy<sup>3,7</sup>, Willem H. Ouwehand<sup>8,9</sup>, Nilesh J. Samani<sup>10</sup>, John A. Todd<sup>2</sup> & Peter Donnelly, (Chair)<sup>11</sup>

### Data and Analysis Committee

Jeffrey C. Barrett<sup>3</sup>, Paul R. Burton<sup>1</sup>, Dan Davison<sup>11</sup>, Peter Donnelly<sup>11</sup>, Doug Easton<sup>12</sup>, David Evans<sup>3</sup>, Hin-Tak Leung<sup>2</sup>, Jonathan L. Marchini<sup>11</sup>, Andrew P. Morris<sup>3</sup>, Chris C. A. Spencer<sup>11</sup>, Martin D. Tobin<sup>1</sup>, Lon R. Cardon, (Co-Chair)<sup>3</sup> & David G. Clayton, (Co-Chair)<sup>2</sup>

### UK Blood Services and University of Cambridge Controls

Antony P. Attwood<sup>5,8</sup>, James P. Boorman<sup>8,9</sup>, Barbara Cant<sup>8</sup>, Ursula Everson<sup>13</sup>, Judith M. Hussey<sup>14</sup>, Jennifer D. Jolley<sup>8</sup>, Alexandra S. Knight<sup>8</sup>, Kerstin Koch<sup>8</sup>, Elizabeth Meech<sup>15</sup>, Sarah Nutland<sup>2</sup>, Christopher V. Prowse<sup>16</sup>, Helen E. Stevens<sup>2</sup>, Niall C. Taylor<sup>8</sup>, Graham R. Walters<sup>17</sup>, Neil M. Walker<sup>2</sup>, Nicholas A. Watkins<sup>8,9</sup>, Thilo Winzer<sup>8</sup>, John A. Todd<sup>2</sup> & Willem H. Ouwehand<sup>8,9</sup>

### 1958 Birth Cohort Controls

Richard W. Jones<sup>18</sup>, Wendy L. McArdle<sup>18</sup>, Susan M. Ring<sup>18</sup>, David P. Strachan<sup>19</sup> & Marcus Pembrey<sup>18,20</sup>

### Bipolar Disorder

Gerome Breen<sup>21</sup>, David St Clair, (Aberdeen)<sup>21</sup>, Sian Caesar<sup>22</sup>, Katherine Gordon-Smith<sup>22,23</sup>, Lisa Jones, (Birmingham)<sup>22</sup>, Christine Fraser<sup>23</sup>, Elaine K. Green<sup>23</sup>, Detelina Grozeva<sup>23</sup>, Marian L. Hamshere<sup>23</sup>, Peter A. Holmans<sup>23</sup>, Ian R. Jones<sup>23</sup>, George Kirov<sup>23</sup>, Valentina Moskvina<sup>23</sup>, Ivan Nikolov<sup>23</sup>, Michael C. O'Donovan<sup>23</sup>, Michael J. Owen<sup>23</sup>, Nick Craddock, (Cardiff)<sup>23</sup>, David A. Collier<sup>24</sup>, Amanda Elkin<sup>24</sup>, Anne Farmer<sup>24</sup>, Richard Williamson<sup>24</sup>, Peter McGuffin, (London)<sup>24</sup>, Allan H. Young<sup>25</sup> & I. Nicol Ferrier, (Newcastle)<sup>25</sup>

## Coronary Artery Disease

Stephen G. Ball<sup>26</sup>, Anthony J. Balmforth<sup>26</sup>, Jennifer H. Barrett<sup>26</sup>, D. Timothy Bishop<sup>26</sup>, Mark M. Iles<sup>26</sup>, Azhar Maqbool<sup>26</sup>, Nadira Yuldasheva<sup>26</sup>, Alistair S. Hall, (Leeds)<sup>26</sup>, Peter S. Braund<sup>10</sup>, Paul R. Burton<sup>1</sup>, Richard J. Dixon<sup>10</sup>, Massimo Mangino<sup>10</sup>, Suzanne Stevens<sup>10</sup>, Martin D. Tobin<sup>1</sup>, John R. Thompson<sup>1</sup> & Nilesh J. Samani, (Leicester)<sup>10</sup>

## Crohn's Disease

Francesca Bredin<sup>27</sup>, Mark Tremelling<sup>27</sup>, Miles Parkes, (Cambridge)<sup>27</sup>, Hazel Drummond<sup>28</sup>, Charles W. Lees<sup>28</sup>, Elaine R. Nimmo<sup>28</sup>, Jack Satsangi, (Edinburgh)<sup>28</sup>, Sheila A. Fisher<sup>29</sup>, Alastair Forbes<sup>30</sup>, Cathryn M. Lewis<sup>29</sup>, Clive M. Onnie<sup>29</sup>, Natalie J. Prescott<sup>29</sup>, Jeremy Sanderson<sup>31</sup>, Christopher G. Mathew, (London)<sup>29</sup>, Jamie Barbour<sup>32</sup>, M. Khalid Mohiuddin<sup>32</sup>, Catherine E. Todhunter, (Newcastle)<sup>32</sup>, John C. Mansfield<sup>32</sup>, Tariq Ahmad<sup>33</sup>, Fraser R. Cummings<sup>33</sup> & Derek P. Jewell, (Oxford)<sup>33</sup>

## Hypertension

John Webster, (Aberdeen)<sup>34</sup>, Morris J. Brown<sup>35</sup>, David G. Clayton, (Cambridge)<sup>2</sup>, G. Mark Lathrop, (Evry)<sup>36</sup>, John Connell<sup>37</sup>, Anna Dominiczak, (Glasgow)<sup>37</sup>, Nilesh J. Samani, (Leicester)<sup>10</sup>, Carolina A. Braga Marcano<sup>38</sup>, Beverley Burke<sup>38</sup>, Richard Dobson<sup>38</sup>, Johannie Gungadoo<sup>38</sup>, Kate L. Lee<sup>38</sup>, Patricia B. Munroe<sup>38</sup>, Stephen J. Newhouse<sup>38</sup>, Abiodun Onipinla<sup>38</sup>, Chris Wallace<sup>38</sup>, Mingzhan Xue<sup>38</sup>, Mark Caulfield, (London)<sup>38</sup> & Martin Farrall, (Oxford)<sup>39</sup>

## Rheumatoid Arthritis

Anne Barton<sup>40</sup>, The Biologics in RA Genetics and Genomics (BRAGGS)<sup>55</sup>, Ian N. Bruce<sup>40</sup>, Hannah Donovan<sup>40</sup>, Steve Eyre<sup>40</sup>, Paul D. Gilbert<sup>40</sup>, Samantha L. Hider<sup>40</sup>, Anne M. Hinks<sup>40</sup>, Sally L. John<sup>40</sup>, Catherine Potter<sup>40</sup>, Alan J. Silman<sup>40</sup>, Deborah P. M. Symmons<sup>40</sup>, Wendy Thomson<sup>40</sup> & Jane Worthington<sup>40</sup>

## Type 1 Diabetes

David G. Clayton<sup>2</sup>, David B. Dunger<sup>2,41</sup>, Sarah Nutland<sup>2</sup>, Helen E. Stevens<sup>2</sup>, Neil M. Walker<sup>2</sup>, Barry Widmer<sup>2,41</sup> & John A. Todd<sup>2</sup>

## Type 2 Diabetes

Timothy M. Frayling<sup>42,43</sup>, Rachel M. Freathy<sup>42,43</sup>, Hana Lango<sup>42,43</sup>, John R. B. Perry<sup>42,43</sup>, Beverley M. Shields<sup>43</sup>, Michael N. Weedon<sup>42,43</sup>, Andrew T. Hattersley, (Exeter)<sup>42,43</sup>, Graham A. Hitman, (London)<sup>44</sup>, Mark Walker, (Newcastle)<sup>45</sup>, Kate S. Elliott<sup>3,7</sup>, Christopher J. Groves<sup>7</sup>, Cecilia M. Lindgren<sup>3,7</sup>, Nigel W. Rayner<sup>3,7</sup>, Nicholas J. Timpson<sup>3,46</sup>, Eleftheria Zeggini<sup>3,7</sup> & Mark I. McCarthy, (Oxford)<sup>3,7</sup>

## Tuberculosis

Melanie Newport<sup>47</sup>, Giorgio Sirugo, (Gambia)<sup>47</sup>, Emily Lyons<sup>3</sup>, Fredrik Vannberg<sup>3</sup> & Adrian V. S. Hill, (Oxford)<sup>3</sup>

## Ankylosing Spondylitis

Linda A. Bradbury<sup>48</sup>, Claire Farrar<sup>49</sup>, Jennifer J. Pointon<sup>48</sup>, Paul Wordsworth<sup>49</sup> & Matthew A. Brown<sup>48,49</sup>

## Autoimmune Thyroid Disease

Jayne A. Franklyn<sup>50</sup>, Joanne M. Heward<sup>50</sup>, Matthew J. Simmonds<sup>50</sup> & Stephen C. L. Gough<sup>50</sup>

## Breast Cancer

Sheila Seal<sup>51</sup>, Breast Cancer Susceptibility Collaboration (UK)<sup>55</sup>, Michael R. Stratton<sup>51,52</sup> & Nazneen Rahman<sup>51</sup>

## Multiple Sclerosis

Maria Ban<sup>53</sup>, An Goris<sup>53</sup>, Stephen J. Sawcer<sup>53</sup> & Alastair Compston<sup>53</sup>

## Gambian Controls

David Conway<sup>47</sup>, Muminatou Jallow<sup>47</sup>, Melanie Newport<sup>47</sup>, Giorgio Sirugo, (Gambia)<sup>47</sup>, Kirk A. Rockett<sup>3</sup> & Dominic P. Kwiatkowski, (Oxford)<sup>3,5</sup>

## DNA, Genotyping, Data QC and Informatics

Suzannah J. Bumpstead<sup>5</sup>, Amy Chaney<sup>5</sup>, Kate Downes<sup>2,5</sup>, Mohammed J. R. Ghori<sup>5</sup>, Rhian Gwilliam<sup>5</sup>, Sarah E. Hunt<sup>5</sup>, Michael Inouye<sup>5</sup>, Andrew Keniry<sup>5</sup>, Emma King<sup>5</sup>, Ralph McGinnis<sup>5</sup>, Simon Potter<sup>5</sup>, Rathi Ravindrarajah<sup>5</sup>, Pamela Whittaker<sup>5</sup>, Claire Widden<sup>5</sup>, David Withers<sup>5</sup>, Panos Deloukas, (Wellcome Trust Sanger Institute Hinxton)<sup>6</sup>, Hin-Tak Leung<sup>2</sup>, Sarah Nutland<sup>2</sup>, Helen E. Stevens<sup>2</sup>, Neil M. Walker<sup>2</sup> & John A. Todd, (Cambridge)<sup>2</sup>

## Statistics

Doug Easton<sup>12</sup>, David G. Clayton, (Cambridge)<sup>2</sup>, Paul R. Burton<sup>1</sup>, Martin D. Tobin, (Leicester)<sup>1</sup>, Jeffrey C. Barrett<sup>3</sup>, David Evans<sup>3</sup>, Andrew P. Morris<sup>3</sup>, Lon R. Cardon, (Oxford)<sup>3</sup>, Niall J. Cardin<sup>11</sup>, Dan Davison<sup>11</sup>, Teresa Ferreira<sup>11</sup>, Joanne Pereira-Gale<sup>11</sup>, Ingileif B. Hallgrimsdóttir<sup>11</sup>, Bryan N. Howie<sup>11</sup>, Jonathan L. Marchini<sup>11</sup>, Chris C. A. Spencer<sup>11</sup>, Zhan Su<sup>11</sup>, Yik Ying Teo<sup>3,11</sup>, Damjan Vukcevic<sup>11</sup> & Peter Donnelly, (Oxford)<sup>11</sup>

## Primary Investigators

David Bentley<sup>5,54</sup>, Matthew A. Brown<sup>48,49</sup>, Lon R. Cardon<sup>3</sup>, Mark Caulfield<sup>38</sup>, David G. Clayton<sup>2</sup>, Alistair Compston<sup>53</sup>, Nick Craddock<sup>23</sup>, Panos Deloukas<sup>5</sup>, Peter Donnelly<sup>11</sup>, Martin Farrall<sup>39</sup>, Stephen C. L. Gough<sup>50</sup>, Alistair S. Hall<sup>26</sup>, Andrew T. Hattersley<sup>42,43</sup>, Adrian V. S. Hill<sup>3</sup>, Dominic P. Kwiatkowski<sup>3,5</sup>, Christopher G. Mathew<sup>29</sup>, Mark I. McCarthy<sup>3,7</sup>, Willem H. Ouwehand<sup>8,9</sup>, Miles Parkes<sup>27</sup>, Marcus Pembrey<sup>18,20</sup>, Nazneen Rahman<sup>51</sup>, Nilesh J. Samani<sup>10</sup>, Michael R. Stratton<sup>51,52</sup>, John A. Todd<sup>2</sup> & Jane Worthington<sup>40</sup>

1. Genetic Epidemiology Group, Department of Health Sciences, University of Leicester, Adrian Building, University Road, Leicester LE1 7RH, UK.
2. Juvenile Diabetes Research Foundation/Wellcome Trust Diabetes and Inflammation Laboratory, Department of Medical Genetics, Cambridge Institute for Medical Research, University of Cambridge, Wellcome Trust/MRC Building, Cambridge CB2 0XY, UK.
3. Wellcome Trust Centre for Human Genetics, University of Oxford, Roosevelt Drive, Oxford OX3 7BN, UK.
4. Department of Psychological Medicine, Henry Wellcome Building, School of Medicine, Cardiff University, Heath Park, Cardiff CF14 4XN, UK.
5. The Wellcome Trust Sanger Institute, Wellcome Trust Genome Campus, Hinxton, Cambridge CB10 1SA, UK.
6. The Wellcome Trust, Gibbs Building, 215 Euston Road, London NW1 2BE, UK.
7. Oxford Centre for Diabetes, Endocrinology and Medicine, University of Oxford, Churchill Hospital, Oxford OX3 7LJ, UK.
8. Department of Haematology, University of Cambridge, Long Road, Cambridge CB2 2PT, UK.
9. National Health Service Blood and Transplant, Cambridge Centre, Long Road, Cambridge CB2 2PT, UK.
10. Department of Cardiovascular Sciences, University of Leicester, Glenfield Hospital, Groby Road, Leicester LE3 9QP, UK.
11. Department of Statistics, University of Oxford, 1 South Parks Road, Oxford OX1 3TG, UK.
12. Cancer Research UK Genetic Epidemiology Unit, Strangeways Research Laboratory, Worts Causeway, Cambridge CB1 8RN, UK.
13. National Health Service Blood and Transplant, Sheffield Centre, Longley Lane, Sheffield S5 7JN, UK.
14. National Health Service Blood and Transplant, Brentwood Centre, Crescent Drive, Brentwood CM15 8DP, UK.
15. The Welsh Blood Service, Ely Valley Road, Talbot Green, Pontyclun CF72 9WB, UK.
16. The Scottish National Blood Transfusion Service, Ellen's Glen Road, Edinburgh EH17 7QT, UK.
17. National Health Service Blood and Transplant, Southampton Centre, Coxford Road, Southampton SO16 5AF, UK.
18. Avon Longitudinal Study of Parents and Children, University of Bristol, 24 Tyndall Avenue, Bristol BS8 1TQ, UK.
19. Division of Community Health Services, St George's University of London, Cranmer Terrace, London SW17 0RE, UK.
20. Institute of Child Health, University College London, 30 Guilford Street, London WC1N 1EH, UK.
21. University of Aberdeen, Institute of Medical Sciences, Foresterhill, Aberdeen AB25 2ZD, UK.
22. Department of Psychiatry, Division of Neuroscience, Birmingham University, Birmingham B15 2QZ, UK.
23. Department of Psychological Medicine, Henry Wellcome Building, School of Medicine, Cardiff University, Heath Park, Cardiff CF14 4XN, UK.
24. SGDP, The Institute of Psychiatry, King's College London, De Crespigny Park, Denmark Hill, London SE5 8AF, UK.
25. School of Neurology, Neurobiology and Psychiatry, Royal Victoria Infirmary, Queen Victoria Road, Newcastle upon Tyne, NE1 4LP, UK.
26. LIGHT and LIMM Research Institutes, Faculty of Medicine and Health, University of Leeds, Leeds LS1 3EX, UK.
27. IBD Research Group, Addenbrooke's Hospital, University of Cambridge, Cambridge CB2 2QQ, UK.
28. Gastrointestinal Unit, School of Molecular and Clinical Medicine, University of Edinburgh, Western General Hospital, Edinburgh EH4 2XU, UK.

29. Department of Medical & Molecular Genetics, King's College London School of Medicine, 8th Floor Guy's Tower, Guy's Hospital, London SE1 9RT, UK.
30. Institute for Digestive Diseases, University College London Hospitals Trust, London, NW1 2BU, UK.
31. Department of Gastroenterology, Guy's and St Thomas' NHS Foundation Trust, London SE1 7EH, UK.
32. Department of Gastroenterology & Hepatology, University of Newcastle upon Tyne, Royal Victoria Infirmary, Newcastle upon Tyne NE1 4LP, UK.
33. Gastroenterology Unit, Radcliffe Infirmary, University of Oxford, Oxford OX2 6HE, UK.
34. Medicine and Therapeutics, Aberdeen Royal Infirmary, Foresterhill, Aberdeen, Grampian AB9 2ZB, UK.
35. Clinical Pharmacology Unit and the Diabetes and Inflammation Laboratory, University of Cambridge, Addenbrookes Hospital, Hills Road, Cambridge CB2 2QQ, UK.
36. Centre National de Genotypage, 2, Rue Gaston Cremieux, Evry, Paris 91057, France.
37. BHF Glasgow Cardiovascular Research Centre, University of Glasgow, 126 University Place, Glasgow G12 8TA, UK.
38. Clinical Pharmacology and Barts and The London Genome Centre, William Harvey Research Institute, Barts and The London, Queen Mary's School of Medicine, Charterhouse Square, London EC1M 6BQ, UK.
39. Cardiovascular Medicine, University of Oxford, Wellcome Trust Centre for Human Genetics, Roosevelt Drive, Oxford OX3 7BN, UK.
40. arc Epidemiology Research Unit, University of Manchester, Stopford Building, Oxford Rd, Manchester M13 9PT, UK.
41. Department of Paediatrics, University of Cambridge, Addenbrooke's Hospital, Cambridge CB2 2QQ, UK.
42. Genetics of Complex Traits, Institute of Biomedical and Clinical Science, Peninsula Medical School, Magdalen Road, Exeter EX1 2LU, UK.
43. Diabetes Genetics, Institute of Biomedical and Clinical Science, Peninsula Medical School, Barrack Road, Exeter EX2 5DU, UK.
44. Centre for Diabetes and Metabolic Medicine, Barts and The London, Royal London Hospital, Whitechapel, London E1 1BB, UK.
45. Diabetes Research Group, School of Clinical Medical Sciences, Newcastle University, Framlington Place, Newcastle upon Tyne NE2 4HH, UK.
46. The MRC Centre for Causal Analyses in Translational Epidemiology, Bristol University, Canynge Hall, Whiteladies Rd, Bristol BS2 8PR, UK.
47. MRC Laboratories, Fajara, The Gambia.
48. Diamantina Institute for Cancer, Immunology and Metabolic Medicine, Princess Alexandra Hospital, University of Queensland, Woolloongabba, Qld 4102, Australia.
49. Botnar Research Centre, University of Oxford, Headington, Oxford OX3 7BN, UK.
50. Department of Medicine, Division of Medical Sciences, Institute of Biomedical Research, University of Birmingham, Edgbaston, Birmingham B15 2TT, UK.
51. Section of Cancer Genetics, Institute of Cancer Research, 15 Cotswold Road, Sutton SM2 5NG, UK.
52. Cancer Genome Project, The Wellcome Trust Sanger Institute, Wellcome Trust Genome Campus, Hinxton, Cambridge CB10 1SA, UK.
53. Department of Clinical Neurosciences, University of Cambridge, Addenbrooke's Hospital, Hills Road, Cambridge CB2 2QQ, UK.
